# Supplementary material for: HNF4α regulates sulfur amino acid metabolism and confers sensitivity to methionine restriction in liver cancer
Source: PubMed Central journal article supplement (PMC7414133; doi:10.1038/s41467-020-17818-w), 2020-08-07

Uncut gels for Fig. 1g

**g**

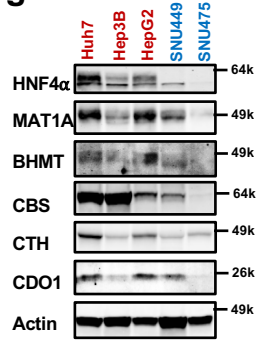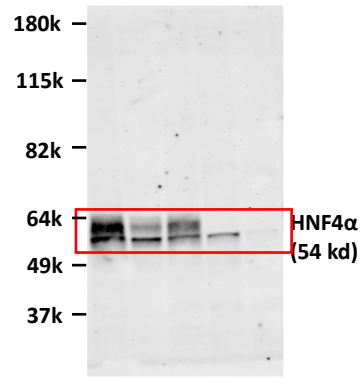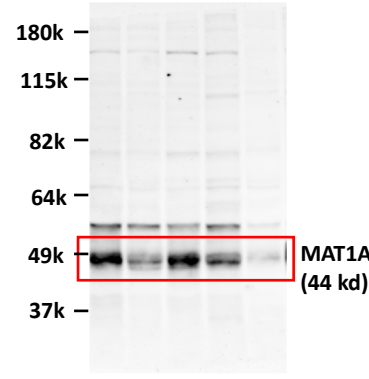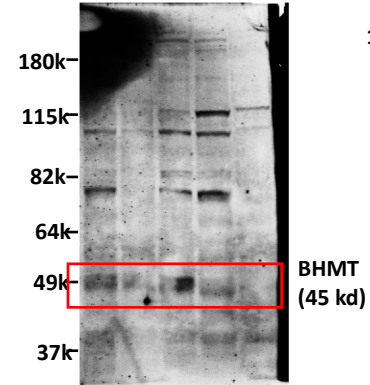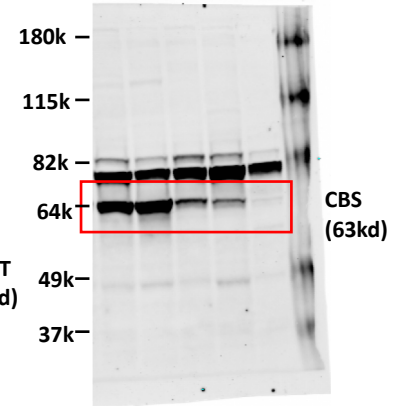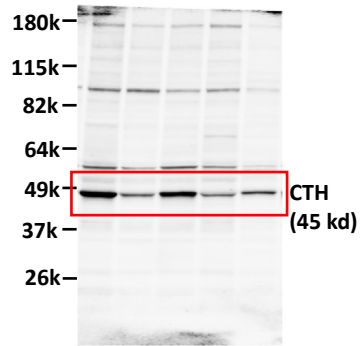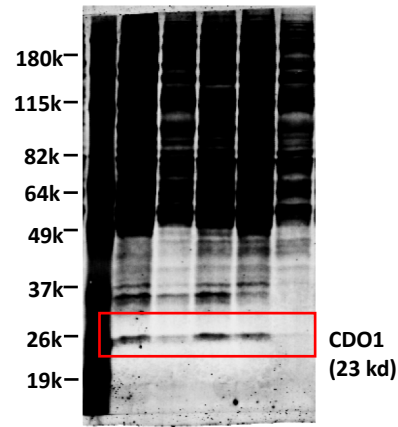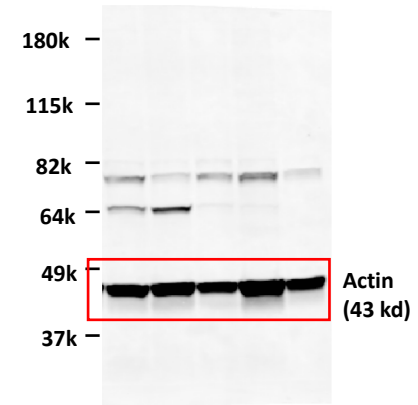

Uncut gels for Fig. 4c

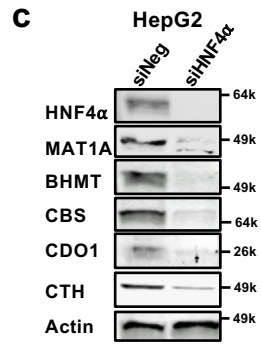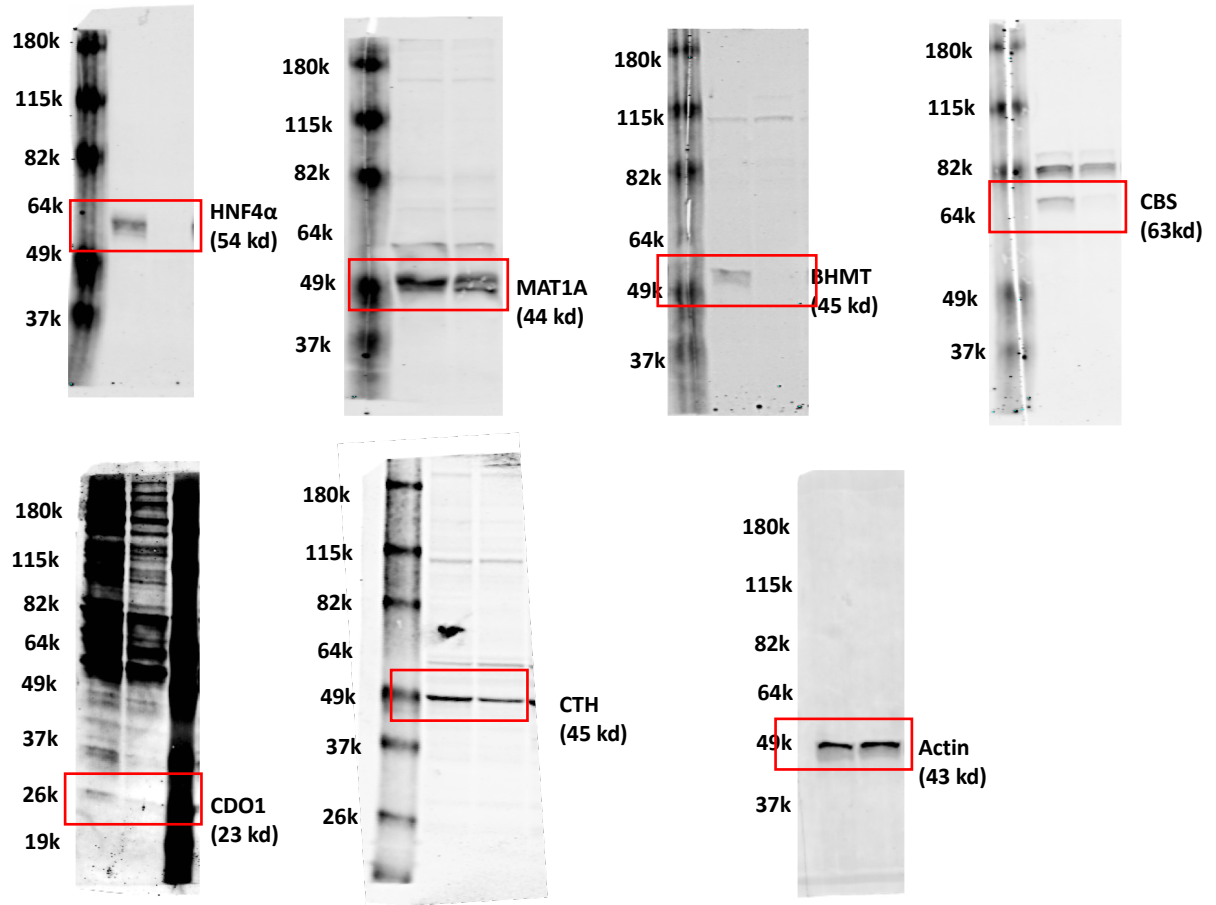

Uncut gels for Fig. 6e

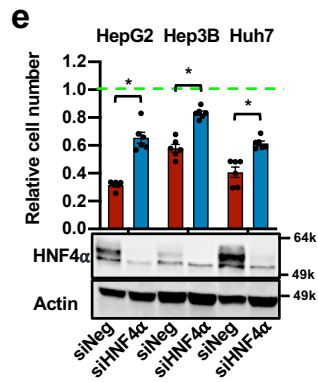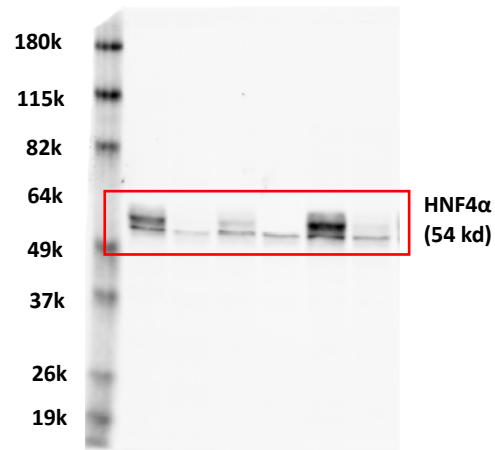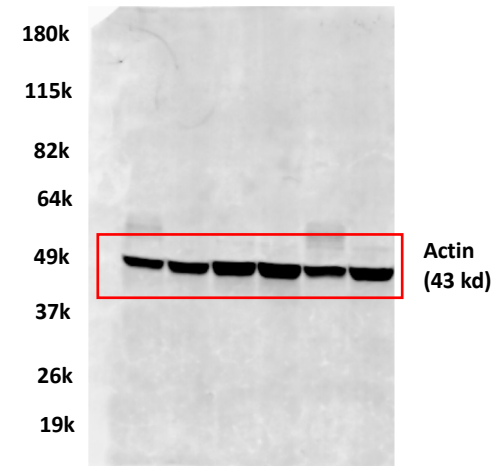

Uncut gels for Supplementary Fig. 4e

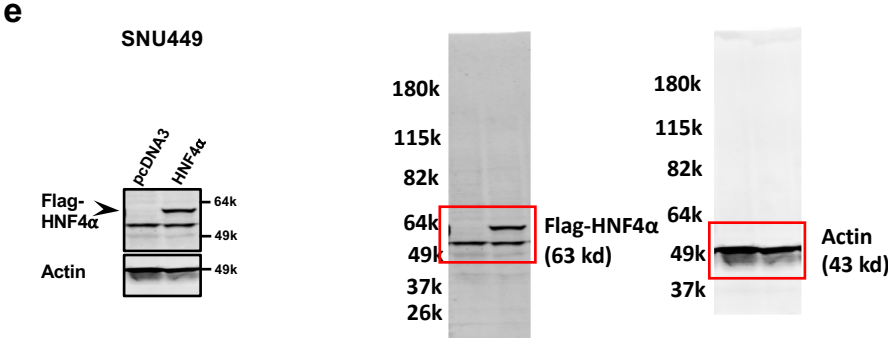

Uncut gels for Supplementary Fig. 6d

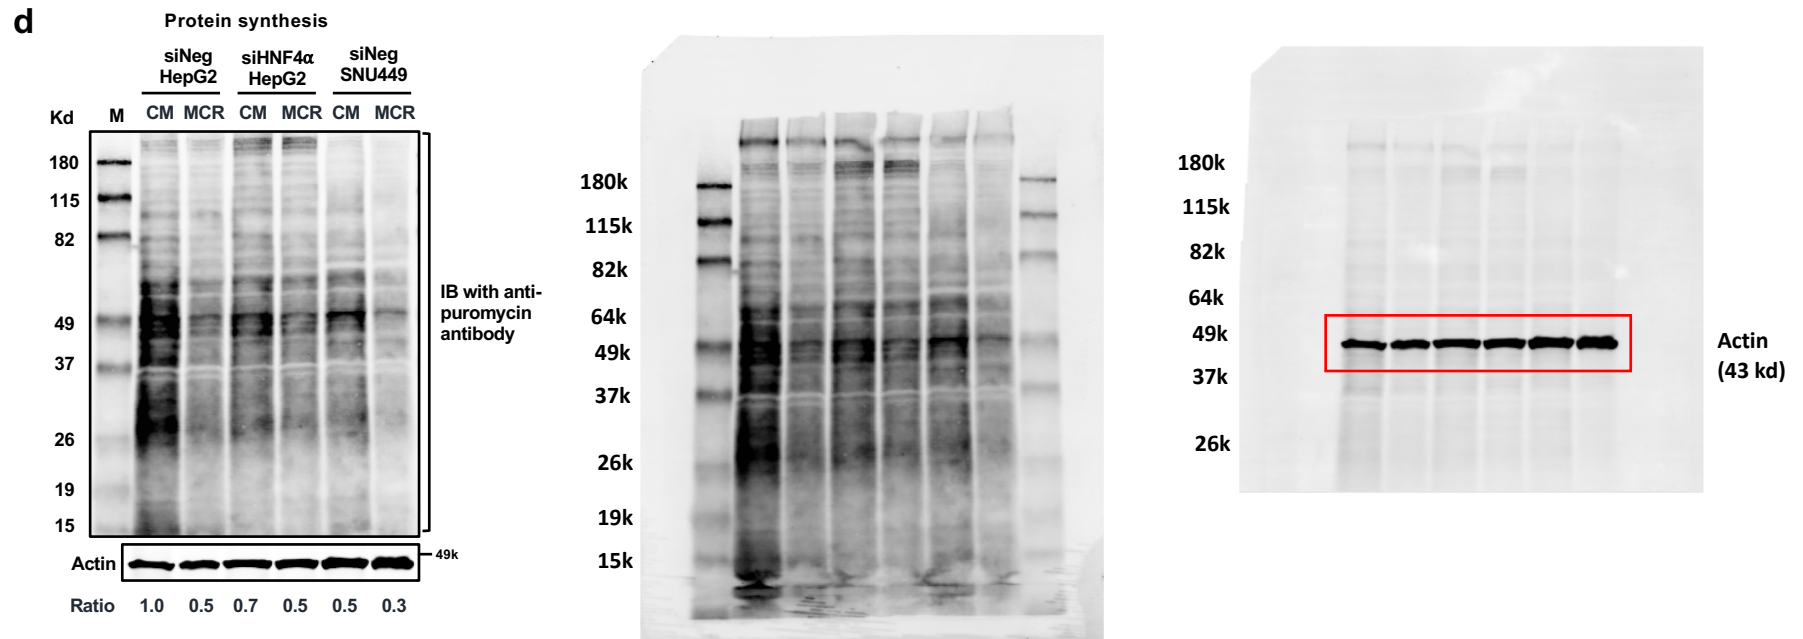

Uncut gels for Supplementary Fig. 8e

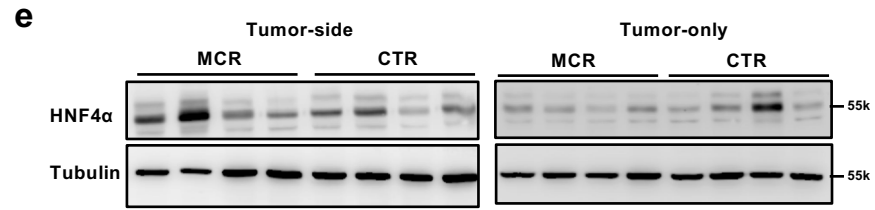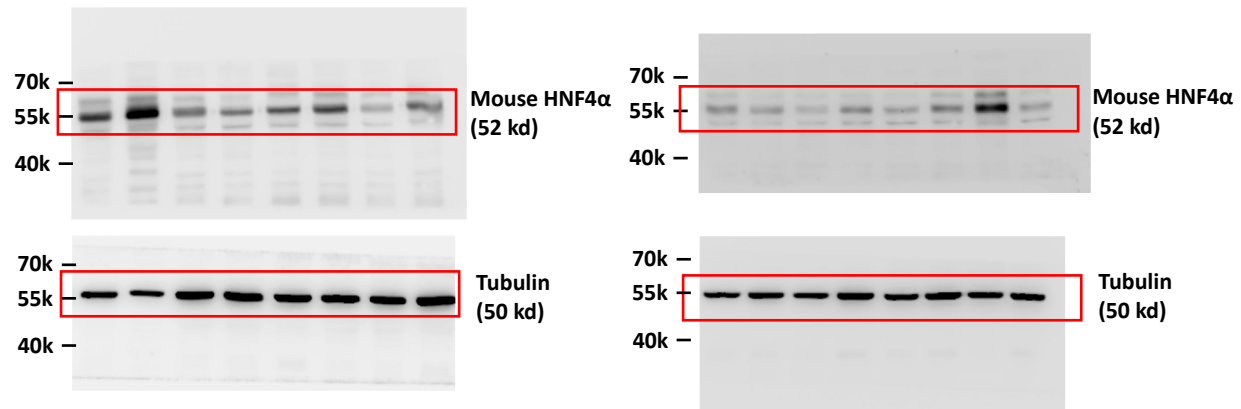

Uncut gels for Supplementary Fig. 10d

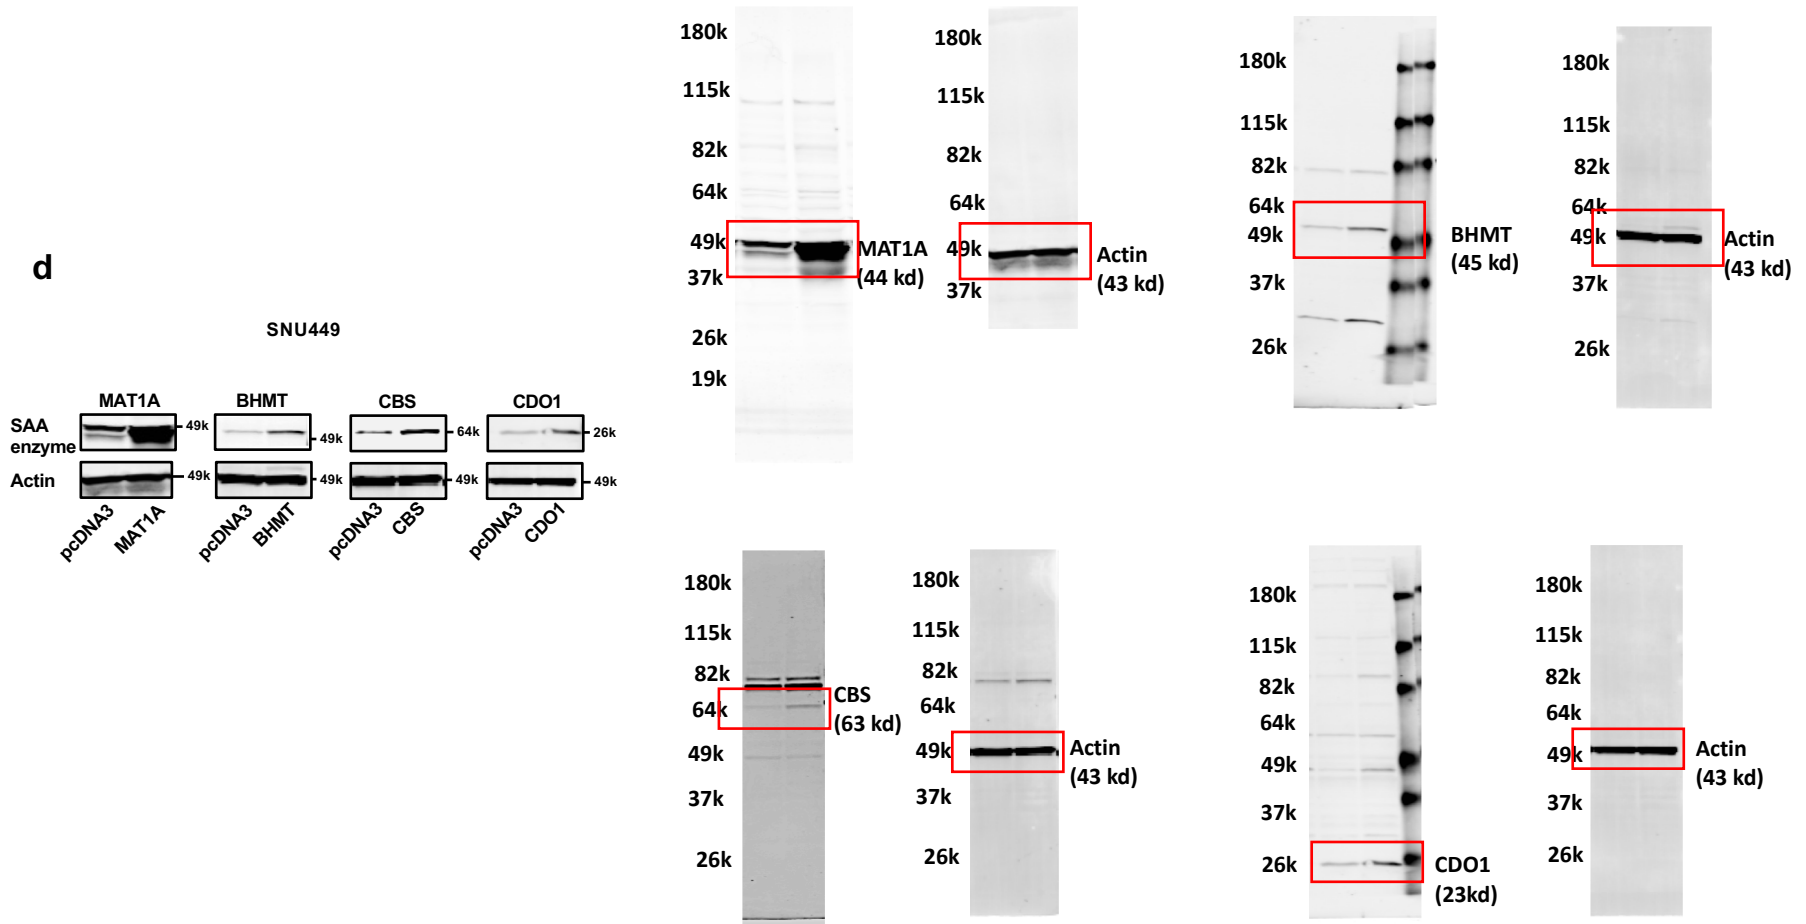

Supplement: 41467_2020_17818_MOESM4_ESM.pdf [file 41467_2020_17818_MOESM4_ESM.pdf]
