# Supplementary material for: HNF4α regulates sulfur amino acid metabolism and confers sensitivity to methionine restriction in liver cancer
Source: PubMed Central journal article supplement (PMC7414133; doi:10.1038/s41467-020-17818-w), 2020-08-07
Supplement: 41467_2020_17818_MOESM1_ESM.pdf [file 41467_2020_17818_MOESM1_ESM.pdf]

## **Supplementary Information**

**HNF4 $\alpha$  regulates sulfur amino acid metabolism and confers sensitivity to methionine restriction in liver cancer**

**Xu et al.**

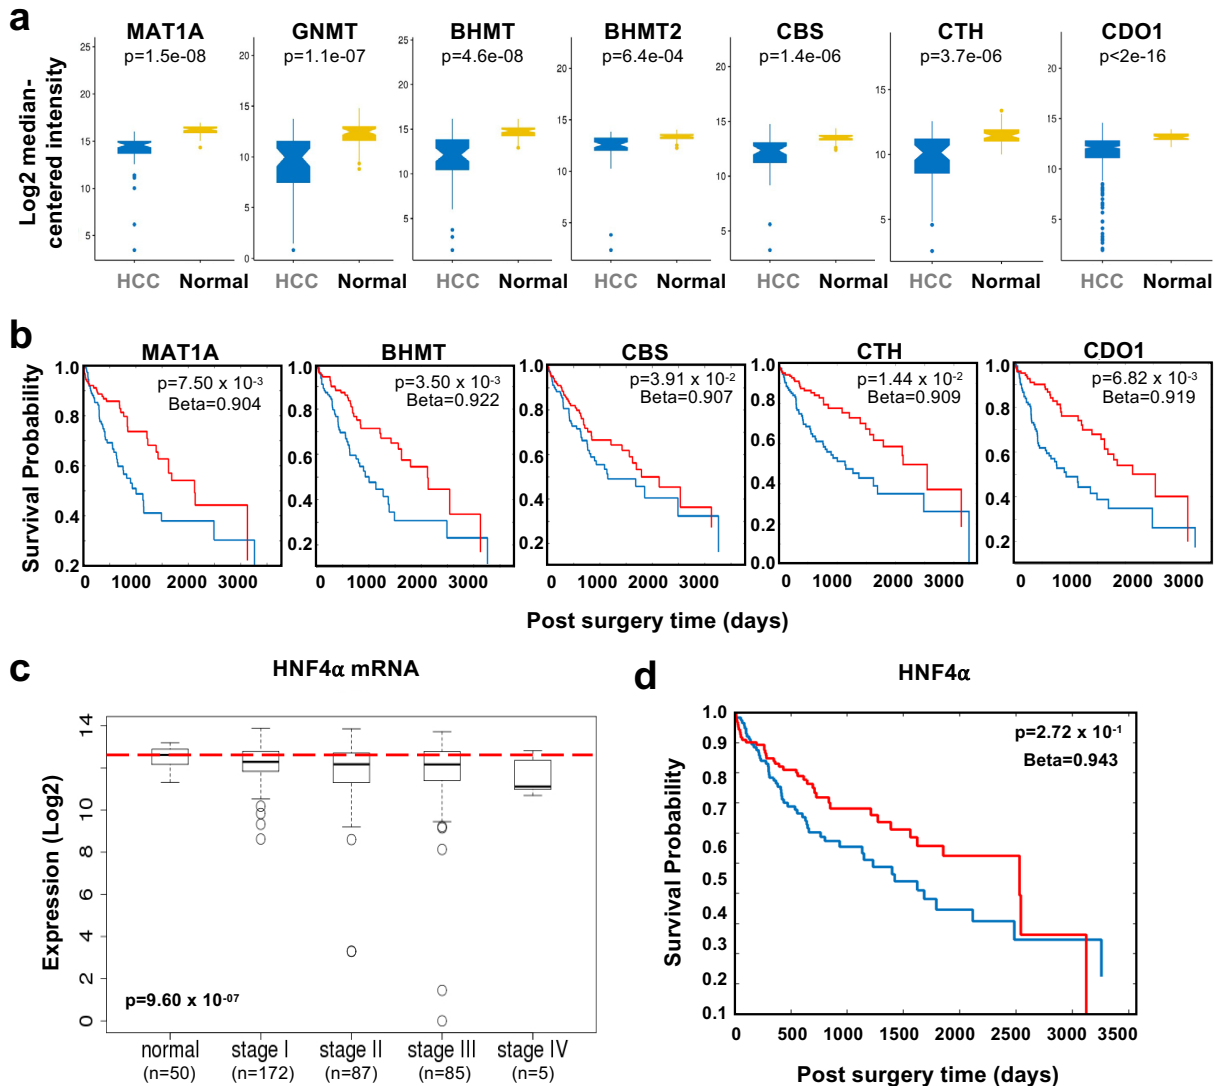

**Supplementary Fig. 1. SAA metabolic enzymes and HNF4 $\alpha$  are reduced and associated with patient survival in liver cancer patients.**

**a** Expression of key SAA metabolic enzymes is reduced in HCC tumors. The processed TCGA RNA-seq gene expression data for  $n=50$  normal and  $n=373$  tumor LIHC samples were downloaded from TCGA data portal. **b** High expression levels of SAA metabolic enzymes are associated with increased survival in HCC patients ( $n=373$ ). The coefficient estimate (beta value) and  $p$ -value using Cox proportional hazards regression were implemented in MATLAB, and the survival distribution was visualized with Kaplan-Meier survival curves. The Kaplan-Meier survival curves were generated using samples whose expression levels were among the top (red) and bottom (blue) 33% of expression values for corresponding genes. **c** HNF4 $\alpha$  expression is reduced in HCC patients at different stages. The processed TCGA RNA-seq gene expression data for 50 normal and 373 tumor LIHC patients at different cancer stages ( $n=172$  at Stage I, 87 at Stage II, 85 at Stage II, and 5 at Stage IV) were downloaded from TCGA data portal. **d** High expression of HNF4 $\alpha$  is associated with increased survival of HCC patients. The Kaplan-Meier survival curves were generated using samples whose expression levels were among the top (red) and bottom (blue) 33% of expression values for HNF4 $\alpha$ . For boxplots in (a) or the line in (c) is located at the median; the box length extends from the 1st quantile (Q1) to the 3rd quantile (Q3) which corresponds to the interquartile range (IQR). The maximum is located at  $Q3 + 1.5 \times IQR$  whereas the minimum is located at  $Q1 - 1.5 \times IQR$ . Points outside the maximum and the minimum were considered as outliers.

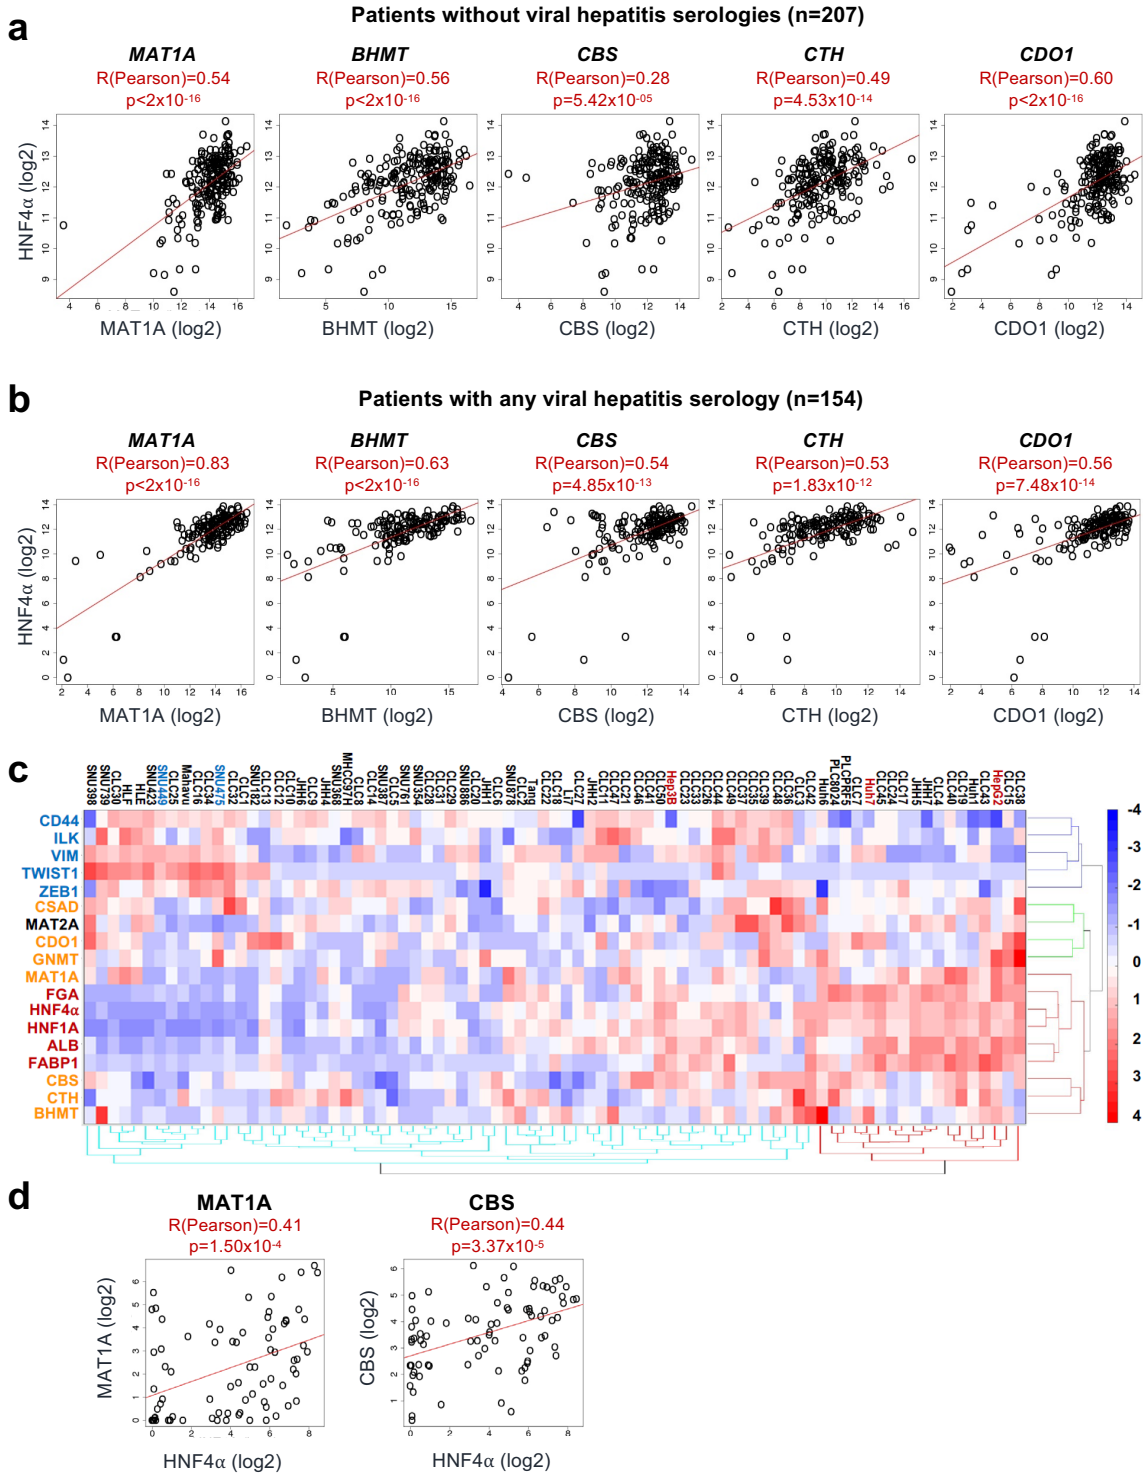

**Supplementary Fig. 2. HNF4 $\alpha$  and SAA metabolic enzymes are positively correlated in liver cancer patients and cells.**

**a** Expression of key SAA metabolic enzymes is positively correlated with HNF4 $\alpha$  expression in non-viral HCC patients (n=207). 207 patients without any viral hepatitis serologies were identified among 373 HCC patients in the TCGA LIHC dataset. The pair-wise Pearson correlation coefficient and the corresponding  $p$ -value between two genes among these patients were calculated using MATLAB. **b** The expression of key SAA metabolic enzymes is positively correlated with HNF4 $\alpha$  expression in any viral HCC patients (n=154). There were 154 patients with any hepatitis viral serology (positive of hepatitis c antibody, hepatitis b surface antigen, hepatitis b surface antibody, hepatitis b core antibody, and/or hepatitis b DNA) in 373 HCC patients in the TCGA LIHC dataset. The pair-wise Pearson correlation coefficient and the corresponding  $p$ -value between two genes among these patients were calculated using MATLAB. **c** HNF4 $\alpha$  is clustered together with key SAA metabolic enzymes in liver cancer cells. The mRNA levels of HNF4 $\alpha$ -mediated liver functional genes (Red), mesenchymal markers (Blue), and SAA metabolic enzymes (Orange) from 81 liver cancer cells from LIMORE database<sup>1</sup> were clustered and represented by the heatmap using MATLAB as described in Methods. Please note that all liver cancer cells in this database were treated with a ROCK inhibitor Y-27632 and a transforming growth factor- $\beta$  inhibitor A83-01 to inhibit mesenchymal cells while supporting epithelial cell growth<sup>1</sup>. **d** The expression of MAT1A and CBS is positively correlated with HNF4 $\alpha$  expression in liver cancer cells from LIMORE database (n=81 liver cancer cell lines).

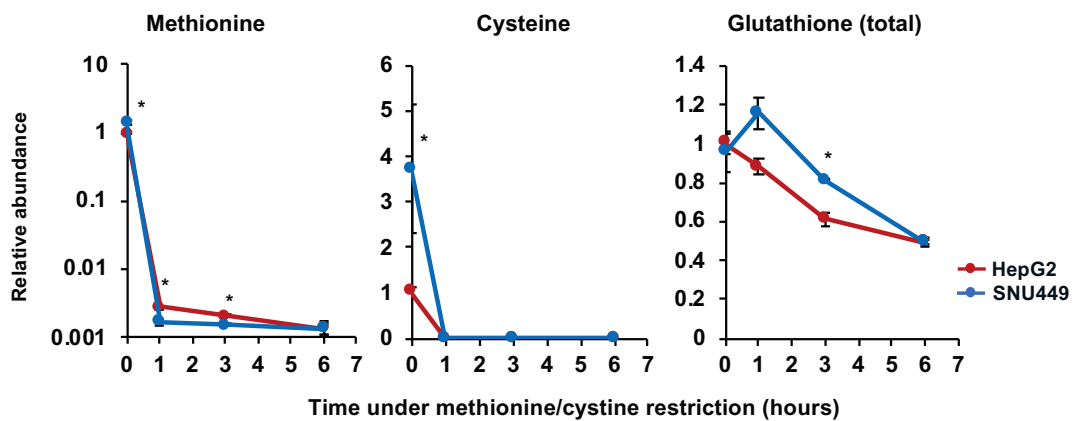

**Supplementary Fig. 3. Methionine/cysteine restriction quickly depletes cellular methionine and cysteine.**

HepG2 and SNU449 cells were cultured in methionine/cysteine restricted medium for indicated times, and the intracellular methionine, cysteine, and glutathione levels were quantified by LC-MS (n=3 replicates per group, values are expressed as mean  $\pm$  s.e.m., two-tailed unpaired Student's t-test, \*p<0.05).

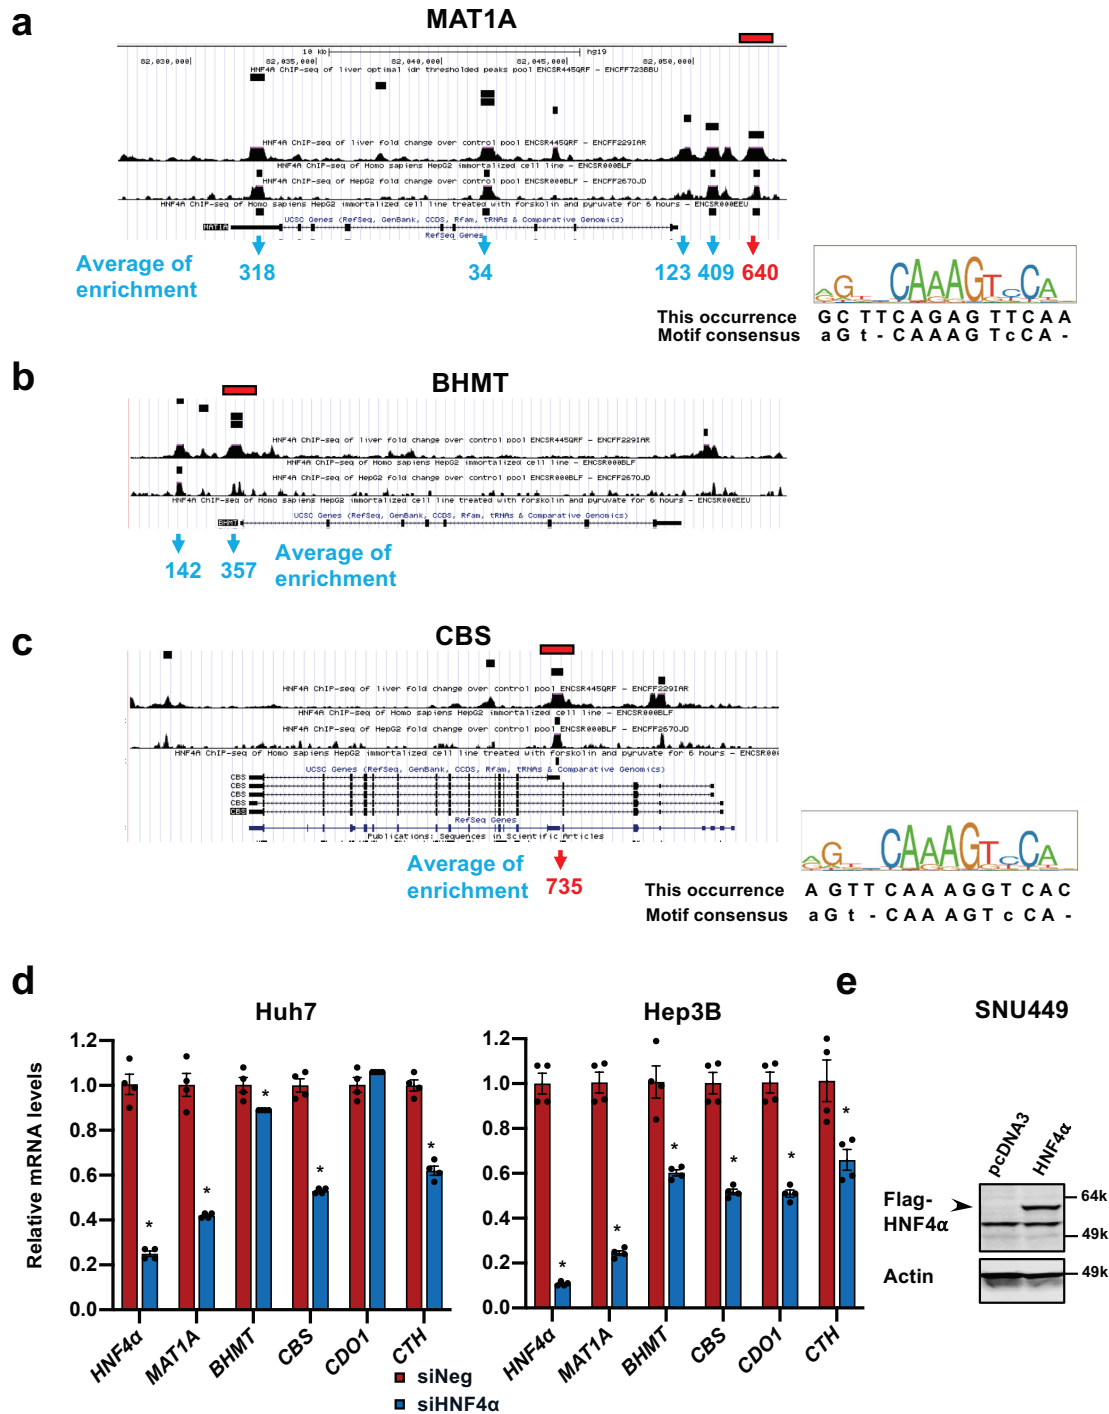

**Supplementary Fig. 4. HNF4 $\alpha$  regulates the transcription of key SAA metabolic genes.**

**a-c** Key SAA metabolic enzymes have HNF4 $\alpha$  binding sites on their promoters. Publicly available data for the HNF4 $\alpha$  ChIP-seq from human liver or HepG2 cells from the ENCODE project<sup>2</sup> were displayed in UCSC genome browser for MAT1A (**a**), BHMT (**b**), and CBS (**c**) genes, and the enrichment scores and consensus HNF4 $\alpha$  binding sites are shown for peaks indicated by the red arrows. Blue arrows indicate additional ChIPseq peaks. Red bars: promoter regions cloned and mutated in the luciferase assay. **d** Knockdown of HNF4 $\alpha$  reduces the mRNA levels of key SAA metabolic enzymes in Huh7 and Hep3B cells. Huh7 and Hep3B cells were transfected with control siRNA (siNeg) or siRNAs against HNF4 $\alpha$  (siHNF4 $\alpha$ ) for 48 hours. mRNA levels of indicated SAA genes were analyzed by qPCR (n=4 replicates per group). **e** Overexpression of HNF4 $\alpha$  in SNU449 cells for the luciferase reporter assay (relative to Fig. 4d). HNF4 $\alpha$ -negative SNU449 cells were transfected with the control vector (pcDNA3) or a construct expressing HNF4 $\alpha$ , and the total cell lysates were immuno-blotted with an anti-HNF4 $\alpha$  antibody (representative blots were shown from at least three independent experiments). For bar graphs in (**d**), values are expressed as mean  $\pm$  s.e.m., two-tailed, unpaired Student's t-test, \*p<0.05.

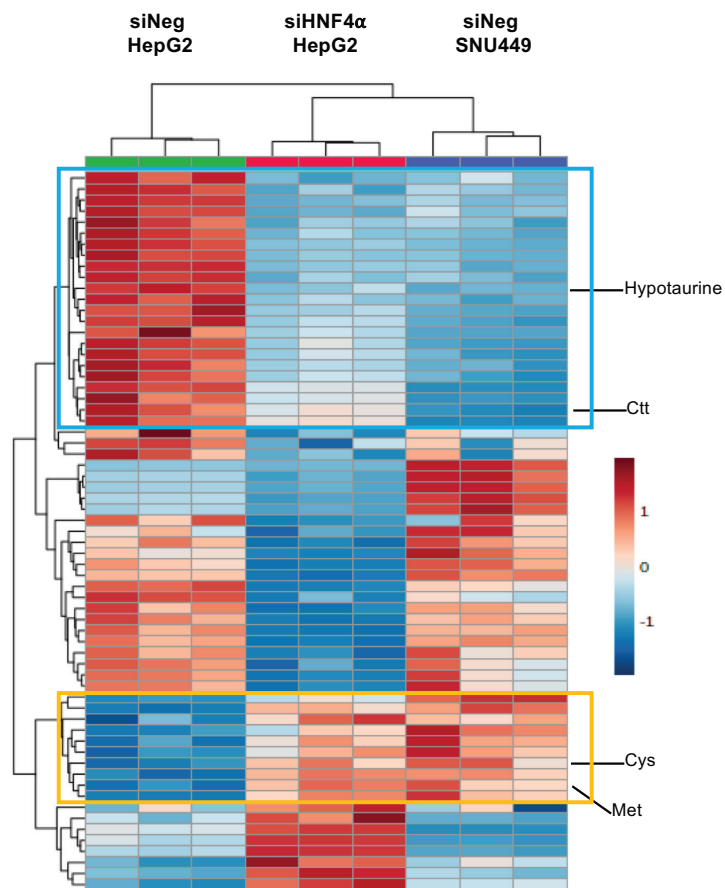

**Supplementary Fig. 5. HNF4 $\alpha$  deficiency impairs SAA metabolism.**

HNF4 $\alpha$ -depleted HepG2 cells and HNF4 $\alpha$ -negative SNU449 cells are metabolically clustered together. A cluster analysis was performed using all significantly ( $p < 0.05$ ,  $|FC| > 1.5$ ) changed metabolites in siHNF4 $\alpha$  vs siNeg HepG2 cells. Blue or orange boxes highlight two major metabolite clusters that are altered in both HNF4 $\alpha$ -depleted HepG2 cells and HNF4 $\alpha$ -negative SNU449 cells.

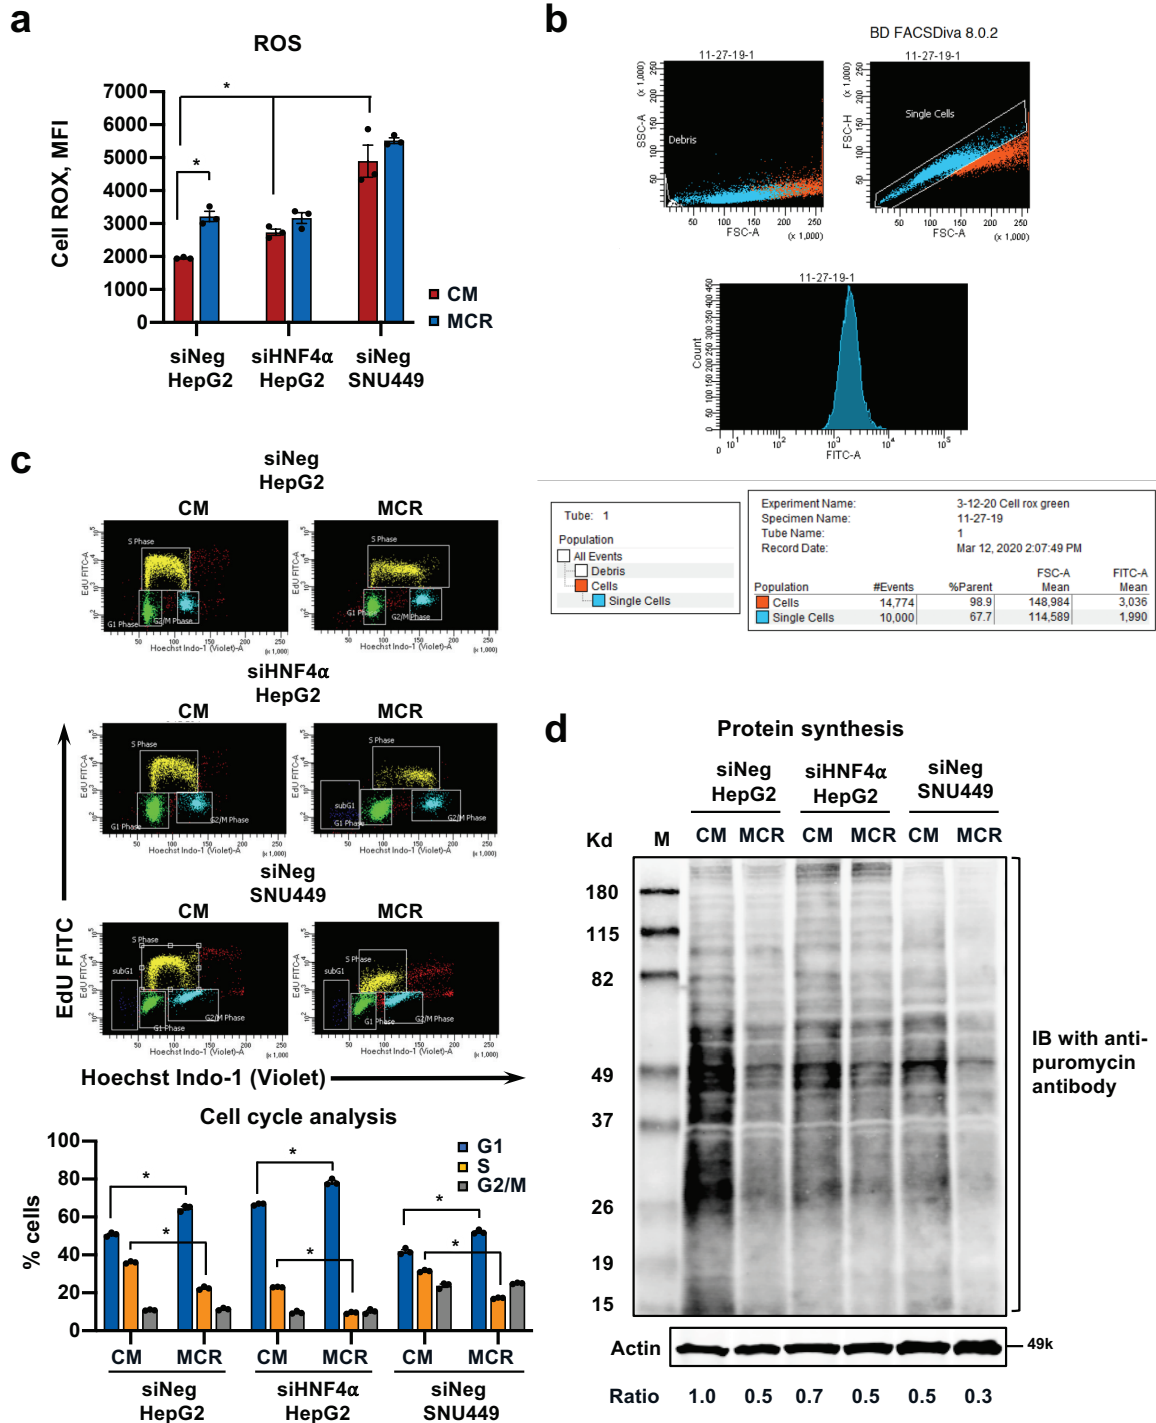

**Supplementary Fig. 6. HNF4α deficiency reduces the sensitivity to SAA restriction.**

**a** HNF4α-depleted HepG2 cells and HNF4α-negative SNU449 cells have increased ROS levels and are not sensitive to further methionine/cystine restriction-induced ROS production (n=3 replicates per group). Indicated cells were cultured in CM and MCR medium for 18 hours. Cells were incubated with CellROX Green for 30 minutes and cellular ROS levels were analyzed by flow cytometry. **b** Gating strategy for defining single-cell populations and representative histogram of CellROX Green fluorescence. **c** Methionine/cystine restriction induces G1 arrest independently of the cellular HNF4α status (n=3 replicates per group). Cells were cultured in CM and MCR medium for 18 hours followed by one-hour incubation with EdU. Cell cycle was analyzed with Click-iT EdU Flow Cytometry Assay Kit. Single-cells population gating was performed as in (b). Gating of the cell cycle phases is shown in the top panel and quantification of percentages of cells in the different cell cycle phases is presented in the bottom panel. **d** Methionine/cystine restriction suppresses protein synthesis independently of the cellular HNF4α status. Indicated cells were cultured in complete medium (CM) and methionine/cystine restricted medium (MCR) medium for 18 hours. 10 μM puromycin were then added to the medium for 10 minutes, and cells were washed with PBS and protein lysates were immuno-blotted with anti-puromycin and anti-actin antibodies. The intensity ratios of puromycin-labeled peptides vs actin control were calculated using Fiji software. For bar graphs in (a, c), values are expressed as mean ± s.e.m., two-tailed, unpaired Student's t-test, \*p<0.05.

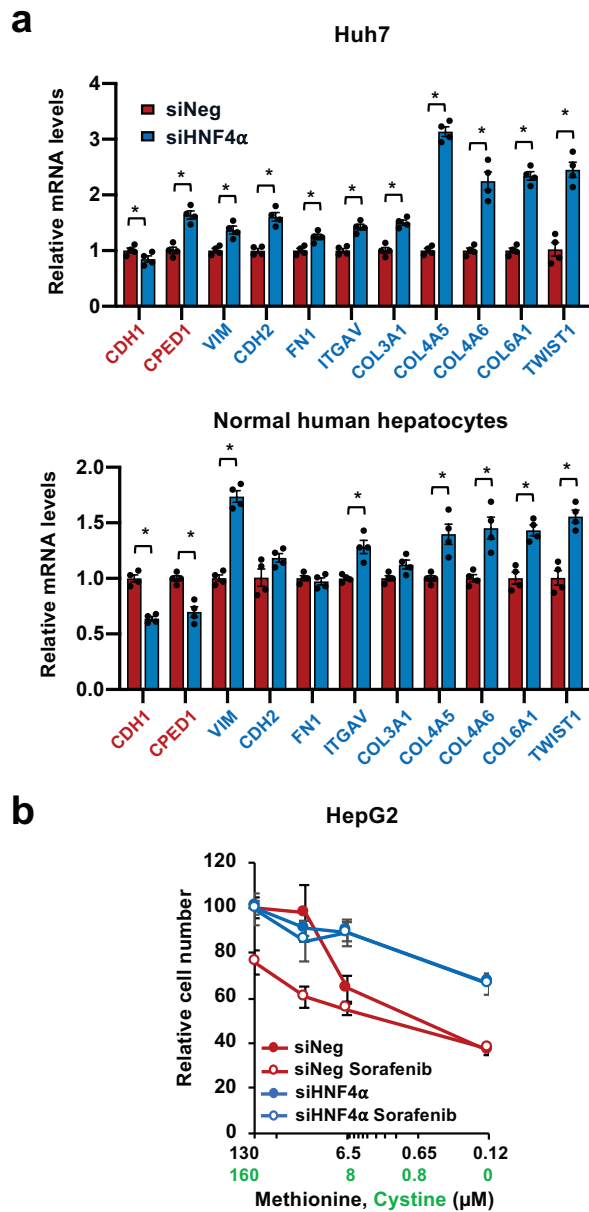

**Supplementary Fig. 7. HNF4 $\alpha$  depletion increases EMT and resistance to methionine restriction in HNF4 $\alpha$ -positive liver cancer cells**

**a** Knocking down HNF4 $\alpha$  represses the expression of epithelial markers while inducing mesenchymal markers. The expression of indicated epithelial (Red) and mesenchymal (Blue) markers were analyzed in control (siNeg) and HNF4 $\alpha$  knockdown (siHNF4 $\alpha$ ) Huh7 and normal human hepatocytes by qPCR (n=4 replicates per group). **b** HNF4 $\alpha$ -depleted HepG2 cells are resistant to cell death induced by methionine/cystine restriction and sorafenib. Control (siNeg) and siHNF4 $\alpha$  HepG2 cells were cultured in medium containing indicated amount of methionine/cystine, together with or without 5  $\mu$ M sorafenib for 24 hours. The relative number of surviving cells was measured by the WST-1 assay (n=3 replicates per group). For all graphs, values are expressed as mean  $\pm$  s.e.m., two-tailed, unpaired Student's t-test, \*p<0.05.



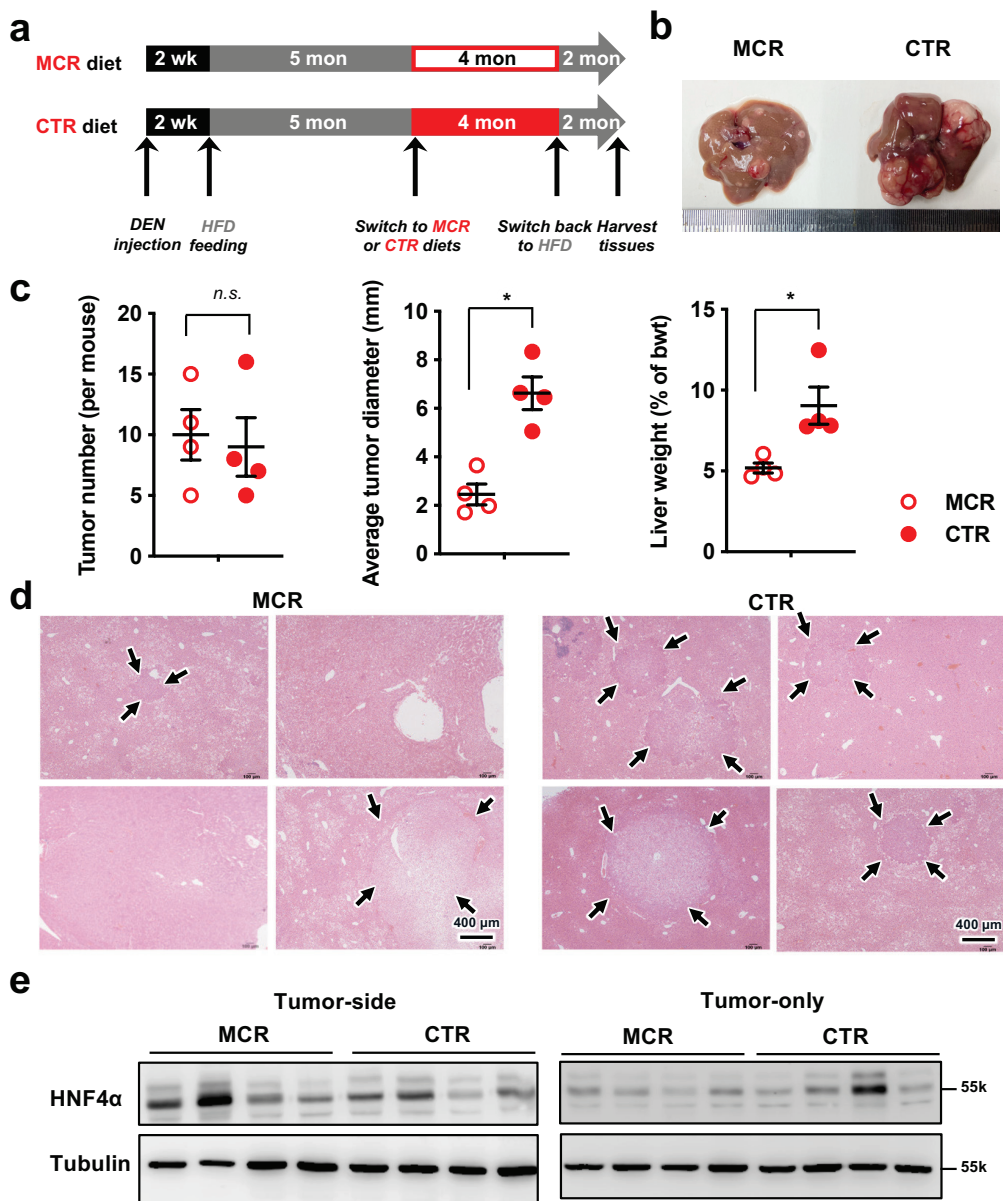

**Supplementary Fig. 8. MCR diet feeding suppresses liver tumorigenesis *in vivo*.**

**a** Experimental scheme of methionine/cystine restriction (MCR) in DEN/HFD-induced liver cancer formation. **b-d** Four-month feeding of MCR diet suppresses liver cancer growth. C57BL/6 mice under the DEN/HFD liver cancer model were fed with a control diet (CTR) or methionine restricted diet (MCR) for four months as indicated in **a**. The liver images (**b**), liver tumor number, tumor size, and liver weight (**c**), and liver histology (**d**) were analyzed at the end of the procedure ( $n=4$  mice in CTR and 4 mice in MCR). H&E images in (**d**) are from 4 individual animals; arrows: tumors. **e** The expression of HNF4 $\alpha$  in final tumor-side tissues (left) and tumors (right) were analyzed by immunoblotting ( $n=4$  mice in CTR and 4 mice in MCR). For dot plots in (**c**), dots depict individual mice, values are expressed as mean  $\pm$  s.e.m., two-tailed, unpaired Student's t-test, \* $p < 0.05$ .

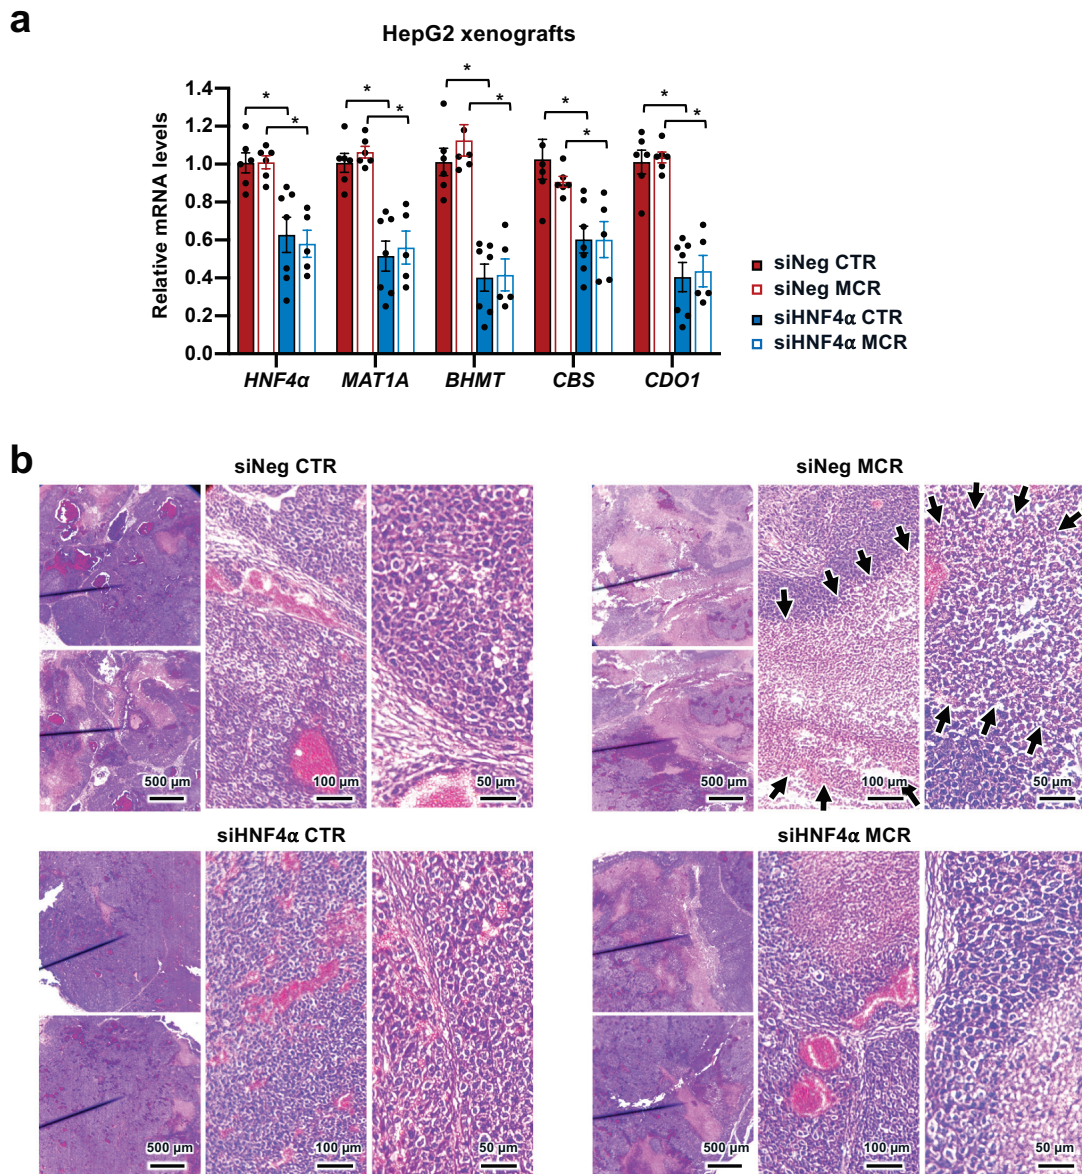

**Supplementary Fig. 9. HNF4 $\alpha$  depletion increases resistance to methionine restriction in HNF4 $\alpha$ -positive liver cancer cells *in vivo*.**

**a** The mRNA levels of HNF4 $\alpha$  and key SAA metabolic enzymes in HepG2 xenografted tumors. Mice bearing control (siNeg) and siHNF4 $\alpha$  HepG2 xenografted tumors were fed with a control diet (CTR) or methionine restricted diet (MCR) as described in Methods, and the expression of indicated genes was analyzed in final dissected tumors by qPCR ( $n=6$  tumors in siNeg CTR, 6 tumors in Neg MCR, 7 tumors in siHNF4 $\alpha$  CTR, and 5 tumors in siHNF4 $\alpha$  MCR). **b** Histology of xenograft tumors. Representative H&E images of control (siNeg) and siHNF4 $\alpha$  HepG2 xenografted tumors fed with a control diet (CTR) or methionine restricted diet (MCR) as in (a). Note that MCR-fed siNeg tumors displayed increased damage and death (arrows). For the bar graph in (a), dots depict individual mice, values are expressed as mean  $\pm$  s.e.m., two-tailed, unpaired, non-parametric Mann-Whitney test, \* $p<0.05$ .

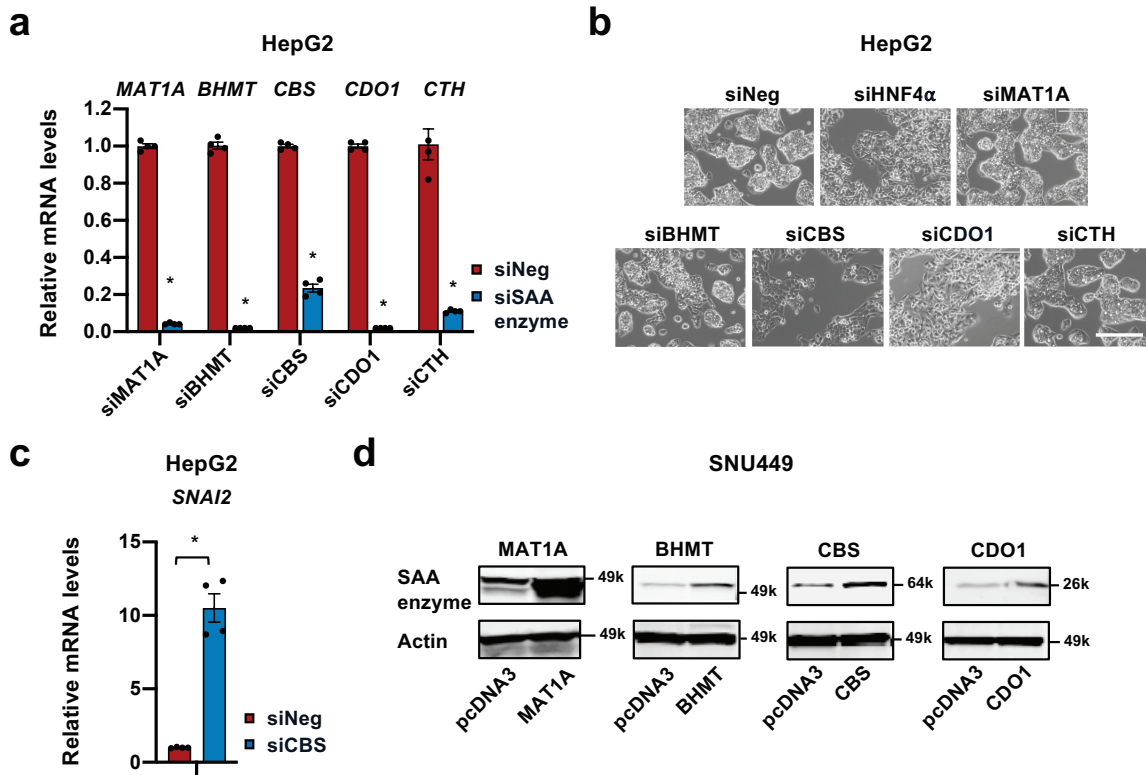

**Supplementary Fig. 10. Manipulation of individual SAA metabolism enzyme affects EMT.**

**a** The expression of SAA enzymes after knockdown of individual SAA enzyme in HepG2 cells. Control (siNeg) HepG2 cells, and HepG2 cells with knockdown of individual SAA enzyme were analyzed for expression of the indicated targeted gene by qPCR (n=4 replicates per group). **b** Knockdown of individual SAA enzyme induces morphological alterations in HepG2 cells. Representative images were shown from at least three independent experiments. Bar, 400  $\mu$ m. **c** Knocking down CBS induces SNAI2 expression in HepG2 cells (n=4 replicates per group). **d** Overexpression of individual SAA enzyme in HNF4 $\alpha$ -negative SNU449 cells. The expression of indicated SAA enzymes was analyzed by immuno-blotting (representative blots were shown from at least three independent experiments). For bar graphs in (a, c), values are expressed as mean  $\pm$  s.e.m., two-tailed, unpaired Student's t-test, \*p<0.05.

**Supplementary Table 1 Metabolites that are significantly altered in SNU449 cells vs HepG2 cells**

| Compound name                                             | HMDB      | PubChem   | KEGG   | Relative abundance |        | * p value |
|-----------------------------------------------------------|-----------|-----------|--------|--------------------|--------|-----------|
|                                                           |           |           |        | HepG2              | SUN449 |           |
| IMP                                                       | HMDB00175 | 8582      | C00130 | 1                  | 0.00   | 0.0247    |
| 5-Phospho-beta-D-ribosylamine                             | HMDB01128 | 439905    | C03090 | 1                  | 0.00   | 0.0162    |
| N2-Formyl-N1-(5-phospho-D-ribosyl)glycinamide             | METPA0491 | NA        | C04376 | 1                  | 0.01   | 0.0053    |
| C9H13N5O3(4)                                              | NA        | NA        | NA     | 1                  | 0.01   | 0.0264    |
| N-Carbamoyl-L-aspartate                                   | HMDB00828 | 93072     | C00438 | 1                  | 0.03   | 0.0023    |
| N-phosphocreatinate                                       | HMDB01511 | 587       | C02305 | 1                  | 0.05   | 0.0004    |
| ribose-phosphate                                          | HMDB01548 | 3417      | C00117 | 1                  | 0.07   | 0.0027    |
| Sedoheptulose 7-phosphate                                 | METPA0585 | NA        | C05382 | 1                  | 0.08   | 0.0070    |
| dUDP                                                      | HMDB01000 | 145729    | C01346 | 1                  | 0.08   | 0.0013    |
| O-Phospho-L-serine                                        | HMDB01721 | 106       | C01005 | 1                  | 0.11   | 0.0150    |
| S-Adenosyl-L-homocysteine                                 | HMDB00939 | 439155    | C00021 | 1                  | 0.12   | 0.0169    |
| 6-Phosphogluconic acid                                    | HMDB01316 | 91493     | C00345 | 1                  | 0.12   | 0.0235    |
| dUMP                                                      | HMDB01409 | 65063     | C00365 | 1                  | 0.12   | 0.0004    |
| Glycerol 3-phosphate                                      | HMDB00126 | 439162    | C00093 | 1                  | 0.12   | 0.0012    |
| 3-methyl-2-oxopentanoate/4-methyl-2-oxopentanoate(ketoleu | HMDB00491 | 47        | C03465 | 1                  | 0.13   | 0.0018    |
| D-Erythrose 4-phosphate                                   | HMDB01321 | 122357    | C00279 | 1                  | 0.13   | 0.0040    |
| (S)-dihydroorotate                                        | HMDB03349 | 439216    | C00337 | 1                  | 0.14   | 0.0000    |
| L-cysteinyglycine                                         | HMDB00078 | 439498    | C01419 | 1                  | 0.16   | 0.0085    |
| decanoyl carnitine                                        | NA        | NA        | NA     | 1                  | 0.17   | 0.0065    |
| S-adenosyl-L-methionine                                   | HMDB01185 | 16757548  | C00019 | 1                  | 0.18   | 0.0116    |
| fructoselysine 3-phosphate                                | NA        | NA        | NA     | 1                  | 0.18   | 0.0012    |
| G6P/F6P                                                   | HMDB01401 | 5958      | C00092 | 1                  | 0.19   | 0.0044    |
| decanoyl carnitine                                        | HMDB06210 | 53477803  |        | 1                  | 0.19   | 0.0002    |
| Deoxyinosine                                              | HMDB00071 | 65058     | C05512 | 1                  | 0.19   | 0.0008    |
| Cystathionine                                             | HMDB00099 | 439258    | C02291 | 1                  | 0.20   | 0.0072    |
| glutathione                                               | HMDB00125 | 124886    | C00051 | 1                  | 0.21   | 0.0130    |
| C27H46O4(3)                                               |           |           |        | 1                  | 0.23   | 0.0133    |
| D-Glucuronate 1-phosphate                                 | HMDB03976 | 440650    | C05385 | 1                  | 0.23   | 0.0009    |
| adenosine                                                 | HMDB00050 | 60961     | C00212 | 1                  | 0.24   | 0.0024    |
| UDP-D-glucuronate                                         | HMDB00935 | 17473     | C00167 | 1                  | 0.25   | 0.0013    |
| ADP-mannose/GDP-L-fucose/ADP alpha-D-glucoside            | HMDB06369 | 440940    | C06192 | 1                  | 0.26   | 0.0014    |
| L-xylonate/L-lyxonate                                     | HMDB00256 | 6971043   | C05411 | 1                  | 0.27   | 0.0025    |
| Hypotaurine                                               | HMDB00965 | 107812    | C00519 | 1                  | 0.29   | 0.0004    |
| N(omega)-(L-Arginino)succinate                            | HMDB00052 | 16950     | C03406 | 1                  | 0.29   | 0.0062    |
| 2-oxoglutarate(2-)                                        | HMDB00208 | 51        | C00026 | 1                  | 0.30   | 0.0107    |
| 11'-Carboxy-alpha-chromanol                               | HMDB12515 | 53481451  |        | 1                  | 0.36   | 0.0038    |
| trans-caffeate/3-(4-hydroxyphenyl)pyruvate                | HMDB03501 | 689043    | C01197 | 1                  | 0.38   | 0.0057    |
| octanoyl carnitine/L-Octanoylcarnitine                    | HMDB00791 | 11953814  | C02838 | 1                  | 0.39   | 0.0020    |
| (R)-carnitine                                             | HMDB00062 | 2724480   | C15025 | 1                  | 0.40   | 0.0018    |
| acetylcholine/4-(trimethylammonio)butanoate               | HMDB00895 | 187       | C01996 | 1                  | 0.40   | 0.0063    |
| lauroyl carnitine                                         | HMDB02250 | 168381    |        | 1                  | 0.42   | 0.0010    |
| pseudoecgonine/ecgonine                                   | HMDB06348 | 443845    | C12449 | 1                  | 0.43   | 0.0002    |
| O-acetylcarnitine                                         | HMDB00201 | 1         | C02571 | 1                  | 0.46   | 0.0017    |
| gulonate                                                  | HMDB03290 | 152304    | C00800 | 1                  | 0.46   | 0.0003    |
| guanosine                                                 | HMDB00133 | 6802      | C00387 | 1                  | 0.46   | 0.0008    |
| L-asparagine                                              | HMDB00168 | 6267      | C00152 | 1                  | 0.46   | 0.0092    |
| Ureidopropionic acid/Glycyl-glycine                       | HMDB00026 | 111       | C02642 | 1                  | 0.46   | 0.0093    |
| 3-Hydroxybutyrylcarnitine                                 | HMDB13127 | 53481617E | NA     | 1                  | 0.50   | 0.0006    |
| UDP-N-acetyl-alpha-D-glucosamine/UDP-N-acetyl-alpha-D     | HMDB00290 | 445675    | C00043 | 1                  | 0.53   | 0.0019    |
| octenoyl carnitine                                        | NA        | NA        | NA     | 1                  | 0.53   | 0.0015    |
| L-arabinitol/xylitol/D-ribitol                            | NA        | NA        | NA     | 1                  | 0.54   | 0.0018    |
| C27H44O3(5)                                               | NA        | NA        | NA     | 1                  | 0.59   | 0.0087    |
| choline phosphate                                         | HMDB01565 | 1014      | C00588 | 1                  | 0.59   | 0.0042    |

|                                                           |           |         |        |   |      |        |
|-----------------------------------------------------------|-----------|---------|--------|---|------|--------|
| aspartate                                                 | HMDB00191 | 5960    | C00049 | 1 | 0.60 | 0.0049 |
| CMP-N-trimethyl-2-aminoethylphosphonate                   | HMDB60072 | 440755  | C05674 | 1 | 0.61 | 0.0020 |
| fumarate                                                  | HMDB00134 | 444972  | C00122 | 1 | 0.62 | 0.0071 |
| CDP-ethanolamine                                          | HMDB01564 | 123727  | C00570 | 1 | 0.62 | 0.0344 |
| cis-aconitate                                             | HMDB00072 | 643757  | C00417 | 1 | 0.62 | 0.0305 |
| CDPcholine                                                | HMDB01413 | 13804   | C00307 | 1 | 0.63 | 0.0105 |
| citrate/isocitrate                                        | HMDB00094 | 311     | C00158 | 1 | 0.63 | 0.0310 |
| CMP                                                       | HMDB00095 | 6131    | C00055 | 1 | 0.64 | 0.0058 |
| pyruvate                                                  | HMDB00243 | 1060    | C00022 | 1 | 0.65 | 0.0133 |
| malate(2-)                                                | HMDB00156 | 222656  | C00149 | 1 | 0.65 | 0.0162 |
| N-acetyl-seryl-aspartate                                  | NA        | NA      | NA     | 1 | 0.66 | 0.0118 |
| C18H32O4(3)                                               | NA        | NA      | NA     | 1 | 1.50 | 0.0062 |
| (R)-mevalonate                                            | HMDB59629 | 439230  | C00408 | 1 | 1.51 | 0.0188 |
| NN-dimethylglycine                                        | HMDB00092 | 673     | C01026 | 1 | 1.52 | 0.0290 |
| 3(S)10(R)-OH-octadeca-6-trans-412-cis-trienoate           | NA        | NA      | NA     | 1 | 1.53 | 0.0063 |
| Hexadecanedioic acid                                      | HMDB00672 | 10459   | C19615 | 1 | 1.53 | 0.0091 |
| sphingosine/(2S)-1-hydroxy-3-oxooctadecan-2-aminium       | HMDB00252 | 5353955 | C00319 | 1 | 1.54 | 0.0169 |
| arginine                                                  | HMDB00517 | 6322    | C00062 | 1 | 1.55 | 0.0345 |
| creatinine                                                | HMDB00562 | 588     | C00791 | 1 | 1.55 | 0.0100 |
| Pyridoxine/Norepinephrine-1                               | HMDB00239 | 1054    | C00314 | 1 | 1.56 | 0.0366 |
| beta-hydroxy-beta-methylbutyrate                          | HMDB00754 | 69362   |        | 1 | 1.56 | 0.0146 |
| L-tyrosine                                                | HMDB00158 | 6057    | C00082 | 1 | 1.57 | 0.0265 |
| lactate                                                   | HMDB00190 | 107689  | C00186 | 1 | 1.57 | 0.0002 |
| adrenochrome/N-benzoylglycinate                           | HMDB12884 | 5898    |        | 1 | 1.57 | 0.0443 |
| benzoate                                                  | HMDB01870 | 243     | C00180 | 1 | 1.58 | 0.0329 |
| C9H8O3(3)                                                 | NA        | NA      | NA     | 1 | 1.58 | 0.0247 |
| coumarin                                                  | HMDB01218 | 323     | C05851 | 1 | 1.59 | 0.0254 |
| D-Glucosamine                                             | HMDB01514 | 439213  | C00329 | 1 | 1.59 | 0.0092 |
| phenylacetaldehyde                                        | HMDB06236 | 998     | C00601 | 1 | 1.62 | 0.0421 |
| stearate                                                  | HMDB00827 | 5281    | C01530 | 1 | 1.62 | 0.0186 |
| 5-oxoproline/L-1-Pyrroline-3-hydroxy-5-carboxylate        | HMDB00267 | 4992    | C01879 | 1 | 1.62 | 0.0406 |
| Nicotinamide                                              | HMDB01406 | 936     | C00153 | 1 | 1.63 | 0.0477 |
| 2-Hydroxybutyric acid                                     | HMDB00008 | 11266   | C05984 | 1 | 1.64 | 0.0098 |
| Hypoxanthine                                              | HMDB00157 | 790     | C00262 | 1 | 1.64 | 0.0236 |
| L-methionine                                              | HMDB00696 | 6137    | C00073 | 1 | 1.64 | 0.0153 |
| L-4-hydroxyglutamate semialdehyde                         | HMDB06556 | 8224    | C05938 | 1 | 1.65 | 0.0012 |
| margarate                                                 | HMDB02259 | 10465   |        | 1 | 1.66 | 0.0105 |
| C20H30O4(18)                                              | NA        | NA      | NA     | 1 | 1.67 | 0.0277 |
| C4H6O3(3)                                                 |           |         |        | 1 | 1.67 | 0.0146 |
| omega hydroxy hexadecanoate (n-C16:0)                     | HMDB06294 | 7058075 |        | 1 | 1.67 | 0.0173 |
| L-tryptophan                                              | HMDB00929 | 6305    | C00078 | 1 | 1.68 | 0.0452 |
| 9,10-hydroxyoctadec-12(Z)-enoate/12,13-hydroxyoctadec-9(2 | HMDB04704 | 9966640 | C14828 | 1 | 1.68 | 0.0001 |
| Xanthine                                                  | HMDB00292 | 1188    | C00385 | 1 | 1.68 | 0.0448 |
| L-Alanyl-L-leucine                                        | HMDB28691 | NA      | NA     | 1 | 1.69 | 0.0230 |
| indole-3-acetate/(5-hydroxyindol-3-yl)acetaldehyde        | HMDB00197 | 802     | C00954 | 1 | 1.69 | 0.0272 |
| alpha-D-glucose                                           | HMDB03345 | 79025   | C00267 | 1 | 1.69 | 0.0075 |
| 4-pyridoxate                                              | HMDB00017 | 6723    | C00847 | 1 | 1.70 | 0.0177 |
| 2-keto-4-methylthiobutyrate                               | HMDB01553 | 473     | C01180 | 1 | 1.70 | 0.0246 |
| N-formylanthranilate/noradrenochrome                      | HMDB04089 | 101399  | C05653 | 1 | 1.73 | 0.0053 |
| succinyl carnitine                                        | NA        | NA      | NA     | 1 | 1.73 | 0.0120 |
| carnosine                                                 | HMDB00033 | 439224  | C00386 | 1 | 1.73 | 0.0303 |
| CDP                                                       | HMDB01546 | 6132    | C00112 | 1 | 1.73 | 0.0075 |
| L-phenylalanine                                           | HMDB00159 | 6140    | C00079 | 1 | 1.75 | 0.0044 |
| succinate(2-)                                             | HMDB00254 | 1110    | C00042 | 1 | 1.75 | 0.0178 |
| Methionine sulfoxide                                      | HMDB02005 | 847     |        | 1 | 1.76 | 0.0037 |
| L-erythrulose                                             | HMDB06293 | 5460032 | C02045 | 1 | 1.78 | 0.0110 |
| C5H10O5(6)                                                | NA        | NA      | NA     | 1 | 1.78 | 0.0122 |
| citr_[L]e                                                 | NA        | NA      | NA     | 1 | 1.80 | 0.0074 |

|                                                                          |           |          |        |   |      |        |
|--------------------------------------------------------------------------|-----------|----------|--------|---|------|--------|
| gama-L- glutamyl-L- alpha- aminobutyrate                                 | NA        | NA       | NA     | 1 | 1.80 | 0.0382 |
| 2-methylglutaconic acid                                                  | HMDB02266 | 6368126  |        | 1 | 1.81 | 0.0101 |
| 4-Hydroxyphenylacetate/2-Hydroxyphenylacetate/3,4-Dihydroxyphenylacetate | HMDB00020 | 127      | C00642 | 1 | 1.81 | 0.0129 |
| beta-carboline                                                           | HMDB12897 | 64961    | C20157 | 1 | 1.83 | 0.0018 |
| Biotin                                                                   | HMDB00030 | 171548   | C00120 | 1 | 1.86 | 0.0119 |
| L-isoleucine/L-leucine                                                   | HMDB00172 | 6306     | C00407 | 1 | 1.86 | 0.0069 |
| C6H11NO3(4)                                                              | NA        | NA       | NA     | 1 | 1.86 | 0.0005 |
| oleic acid/elaidate/trans-vaccenate                                      | HMDB00207 | 445639   | C00712 | 1 | 1.87 | 0.0484 |
| L-histidine                                                              | HMDB00177 | 6274     | C00135 | 1 | 1.87 | 0.0260 |
| naphthalene                                                              | HMDB29751 | 931      | C00829 | 1 | 1.91 | 0.0264 |
| Deoxyuridine                                                             | HMDB00012 | 13712    | C00526 | 1 | 1.93 | 0.0129 |
| myo-inositol                                                             | HMDB00211 | NA       | C00137 | 1 | 1.96 | 0.0139 |
| C6H12O6(5)                                                               | NA        | NA       | NA     | 1 | 1.97 | 0.0150 |
| Valine                                                                   | HMDB00883 | 6287     | C00183 | 1 | 1.98 | 0.0015 |
| C20H32O4(21)                                                             | NA        | NA       | NA     | 1 | 1.99 | 0.0205 |
| (R)-S-lactoylglutathionate                                               | HMDB01066 | 440018   | C03451 | 1 | 2.02 | 0.0065 |
| 2-Ketobutyric acid                                                       | HMDB00005 | 58       | C00109 | 1 | 2.02 | 0.0008 |
| Trimethylamine N-oxide                                                   | HMDB00925 | 1145     | C01104 | 1 | 2.04 | 0.0015 |
| acetoacetate                                                             | HMDB00060 | 96       | C00164 | 1 | 2.05 | 0.0007 |
| 5-Hydroxyindoleacetate                                                   | HMDB00763 | 1826     | C05635 | 1 | 2.05 | 0.0009 |
| N-acetylneuraminic acid                                                  | HMDB00230 | 445063   | C19910 | 1 | 2.05 | 0.0081 |
| L-kynurenine/Formyl-5-hydroxykynurenamine                                | HMDB00684 | 161166   | C00328 | 1 | 2.06 | 0.0003 |
| cytidine                                                                 | HMDB00089 | 6175     | C00475 | 1 | 2.07 | 0.0043 |
| CTP                                                                      | HMDB00082 | 6176     | C00063 | 1 | 2.12 | 0.0046 |
| phytanic acid/arachidic acid                                             | HMDB00801 | 26840    | C01607 | 1 | 2.12 | 0.0032 |
| cholesterol sulfate                                                      | HMDB00653 | 65076    | C18043 | 1 | 2.16 | 0.0149 |
| methyl indole-3-acetate                                                  | HMDB29738 | 74706    |        | 1 | 2.16 | 0.0009 |
| C20H30O3(6)                                                              | NA        | NA       | NA     | 1 | 2.20 | 0.0323 |
| allantoate                                                               | HMDB01209 | 203      | C00499 | 1 | 2.23 | 0.0300 |
| linoleic acid/linoelaidic acid (all trans C18:2)/octadecadienoate        | HMDB00673 | 5280450  | C01595 | 1 | 2.27 | 0.0075 |
| choline                                                                  | HMDB00097 | 305      | C00114 | 1 | 2.28 | 0.0315 |
| Glycylleucine                                                            | HMDB00759 | 92843    | C02155 | 1 | 2.35 | 0.0149 |
| beta-D-Fructose 1,6-bisphosphate                                         | HMDB04444 | 10267    | C05378 | 1 | 2.36 | 0.0120 |
| L-Iditol/D-glucitol/galactitol                                           | NA        | NA       | NA     | 1 | 2.38 | 0.0046 |
| tetradecanoyl carnitine(myristoyl carnitine)                             | HMDB05066 | 53477791 |        | 1 | 2.41 | 0.0112 |
| quinolinate                                                              | HMDB00232 | 1066     | C03722 | 1 | 2.43 | 0.0005 |
| docosahexaenoate(DHA)                                                    | HMDB02183 | 445580   | C06429 | 1 | 2.44 | 0.0118 |
| 8,11,14-Eicosatrienoic acid (DGLA)                                       | HMDB02925 | 5280581  | C03242 | 1 | 2.46 | 0.0061 |
| N-Methylethanolamine phosphate                                           | NA        | NA       | C01210 | 1 | 2.59 | 0.0036 |
| L-fucose/L-Fuculose                                                      | HMDB00174 | 17106    | C01019 | 1 | 2.62 | 0.0019 |
| GDP-D-mannose                                                            | HMDB01163 | 18396    | C00096 | 1 | 2.68 | 0.0452 |
| N-acetyl-L- glutamate                                                    | HMDB01138 | 185      | C00624 | 1 | 2.73 | 0.0037 |
| C20H30O2(4)                                                              | NA        | NA       | NA     | 1 | 2.79 | 0.0048 |
| sn-Glycero-3-phosphocholine                                              | HMDB00086 | 71920    | C00670 | 1 | 2.88 | 0.0040 |
| C20H32O3(12)                                                             | NA        | NA       | NA     | 1 | 2.91 | 0.0479 |
| trans-Hexadec-2-enoyl carnitine                                          | HMDB06317 | 53477817 |        | 1 | 2.92 | 0.0057 |
| L-cysteine                                                               | HMDB00574 | 5862     | C00097 | 1 | 2.95 | 0.0180 |
| acetylcarnosine                                                          | HMDB12881 | 10221026 |        | 1 | 3.12 | 0.0069 |
| N(2)-acetyl-L-ornithine                                                  | HMDB03357 | 439232   | C00437 | 1 | 3.25 | 0.0005 |
| alpha-linolenyl carnitine/gamma-linolenyl carnitine                      | HMDB06319 | 53477821 |        | 1 | 3.35 | 0.0085 |
| arachidonic acid                                                         | HMDB01043 | 444899   | C00219 | 1 | 3.51 | 0.0023 |
| 5-guanidino-2-oxopentanoic acid                                          | HMDB04225 | 558      | C03771 | 1 | 3.69 | 0.0054 |
| Galactosylglycerol                                                       | HMDB06790 | 656504   | C05401 | 1 | 4.05 | 0.0075 |
| clupanodonic acid/docosa-4,7,10,13,16-pentaenoic acid                    | HMDB06528 | 5497182  | C16513 | 1 | 4.44 | 0.0039 |
| pentadenoyl carnitine                                                    | NA        | NA       | NA     | 1 | 4.78 | 0.0043 |
| Linoleyl carnitine/Linoelaidyl carnitine                                 | HMDB06469 | 6450015  |        | 1 | 6.17 | 0.0042 |
| Elaidic carnitine/Vaccenyl carnitine                                     | HMDB06464 | 53477837 |        | 1 | 7.09 | 0.0028 |
| L-palmitoylcarnitine                                                     | HMDB00222 | 11953816 | C02990 | 1 | 8.08 | 0.0015 |

|                                          |           |          |        |   |        |        |
|------------------------------------------|-----------|----------|--------|---|--------|--------|
| dIMP                                     | HMDB06555 | 91531    | C06196 | 1 | 10.93  | 0.0342 |
| heptadecanoyl carnitine                  | HMDB06210 | 53477803 |        | 1 | 13.21  | 0.0013 |
| stearoylcarnitine                        | HMDB00848 | 6426855  |        | 1 | 16.06  | 0.0006 |
| 5-amino-1-(5-phospho-D-ribosyl)imidazole | HMDB01235 | 161500   | C03373 | 1 | 19.97  | 0.0238 |
| 1-methylnicotinamide                     | HMDB00699 | 457      | C02918 | 1 | 231.03 | 0.0057 |

\* n=3 repeats, p value was calculated using two-tailed unpaired Student's t-test.



**Supplementary Table 2 Metabolites that are significantly altered in siHNF4A vs siNeg HepG2 cells**

| Compound name                                       | HMDB      | PubChem   | KEGG   | Relative abundance |               | * p value |
|-----------------------------------------------------|-----------|-----------|--------|--------------------|---------------|-----------|
|                                                     |           |           |        | HepG2 siNeg        | HepG2 siHNF4A |           |
| CMP-N-trimethyl-2-aminoethylphosphonate             | HMDB0072  | 440755    | C05674 | 1                  | 0.03          | 0.00011   |
| dTTP                                                | HMDB01342 | 64968     | C00459 | 1                  | 0.03          | 0.00634   |
| Deoxyinosine                                        | HMDB00071 | 65058     | C05512 | 1                  | 0.04          | 0.00182   |
| 2-deoxycytidine                                     | HMDB00014 | 13711     | C00881 | 1                  | 0.23          | 0.00037   |
| C9H13N5O3(4)                                        | NA        | NA        | NA     | 1                  | 0.26          | 0.04075   |
| 3-hydroxyhexadecanoylcarnitine                      | HMDB13336 | 53481691  |        | 1                  | 0.28          | 0.01944   |
| L-xylionate/L-lyxonate                              | HMDB00256 | 6971043   | C05411 | 1                  | 0.32          | 0.00362   |
| cytosine                                            | HMDB00630 | 597       | C00380 | 1                  | 0.32          | 0.00076   |
| decanoyl carnitine                                  | NA        | NA        | NA     | 1                  | 0.32          | 0.00699   |
| butyryl carnitine                                   | HMDB02013 | 439829    | C02862 | 1                  | 0.33          | 0.00699   |
| D-Glucuronate 1-phosphate                           | HMDB03976 | 440650    | C05385 | 1                  | 0.34          | 0.00080   |
| Phosphodimethylethanolamine                         | HMDB00244 | NA        | C13482 | 1                  | 0.34          | 0.00836   |
| 24-oxo-1 $\alpha$ -23-25-trihydroxyvitamin D3       | HMDB00129 | 10478755  | NA     | 1                  | 0.35          | 0.02249   |
| alpha-linolenyl carnitine/gamma-linolenyl carnitine | HMDB06319 | 53477821  |        | 1                  | 0.36          | 0.00071   |
| Hypotaurine                                         | HMDB00965 | 107812    | C00519 | 1                  | 0.38          | 0.00040   |
| 2-aminomuconate                                     | HMDB01241 | 5280499   | C02220 | 1                  | 0.39          | 0.00558   |
| decanoyl carnitine                                  | HMDB06210 | 53477803  |        | 1                  | 0.39          | 0.00030   |
| pseudoecgonine/ecgonine                             | HMDB06348 | 443845    | C12449 | 1                  | 0.39          | 0.00003   |
| N-acetyl-L-aspartate/2-Amino-3-oxoadipate           | HMDB00812 | 65065     | C01042 | 1                  | 0.39          | 0.00283   |
| tetradecanoyl carnitine                             | HMDB13329 | 53481677  |        | 1                  | 0.42          | 0.03306   |
| octanoyl carnitine/L-Octanoylcarnitine              | HMDB00791 | 11953814  | C02838 | 1                  | 0.43          | 0.00038   |
| lauroyl carnitine                                   | HMDB02250 | 168381    |        | 1                  | 0.43          | 0.00075   |
| 3-Hydroxybutyrylcarnitine                           | HMDB13127 | 53481617E | NA     | 1                  | 0.44          | 0.00059   |
| N-phosphocreatinate                                 | HMDB01511 | 587       | C02305 | 1                  | 0.44          | 0.00099   |
| (R)-carnitine                                       | HMDB00062 | 2724480   | C15025 | 1                  | 0.45          | 0.00260   |
| octenoyl carnitine                                  | NA        | NA        | NA     | 1                  | 0.46          | 0.00120   |
| UDP-D-glucuronate                                   | HMDB00935 | 17473     | C00167 | 1                  | 0.46          | 0.00109   |
| O-Phospho-L-serine                                  | HMDB01721 | 106       | C01005 | 1                  | 0.47          | 0.03803   |
| N-Methylethanolamine phosphate                      | NA        | NA        | C01210 | 1                  | 0.47          | 0.00025   |
| tiglyl carnitine                                    | HMDB02366 | 22833596  | NA     | 1                  | 0.47          | 0.01486   |
| 3-dehydro-L-gulonate/D-glucuronate/L-iduronate      | HMDB06334 | 439273    | C00618 | 1                  | 0.50          | 0.00355   |
| O-acetylcarnitine                                   | HMDB00201 | 1         | C02571 | 1                  | 0.50          | 0.00105   |
| 3-hydroxy-isovaleryl carnitine                      | NA        | NA        | NA     | 1                  | 0.50          | 0.00350   |
| acetylcholine/4-(trimethylammonio)butanoate         | HMDB00895 | 187       | C01996 | 1                  | 0.53          | 0.01565   |
| 11'-Carboxy-alpha-chromanol                         | HMDB12515 | 53481451  |        | 1                  | 0.54          | 0.01205   |
| Sedoheptulose 7-phosphate                           | METPA0585 | NA        | C05382 | 1                  | 0.56          | 0.02578   |
| 4,6-Dihydroxyquinoline/quinoline-4,8-diol           | HMDB04077 | 440738    | C05639 | 1                  | 0.56          | 0.00110   |
| Cystathionine                                       | HMDB00099 | 439258    | C02291 | 1                  | 0.59          | 0.03189   |
| choline phosphate                                   | HMDB01565 | 1014      | C00588 | 1                  | 0.59          | 0.00534   |
| trans-Hexadec-2-enoyl carnitine                     | HMDB06317 | 53477817  |        | 1                  | 0.60          | 0.00229   |
| Taurine                                             | HMDB00251 | 1123      | C00245 | 1                  | 0.60          | 0.00870   |
| gulonate                                            | HMDB03290 | 152304    | C00800 | 1                  | 0.60          | 0.00100   |
| Linoleyl carnitine/Linolealidyl carnitine           | HMDB06469 | 6450015   |        | 1                  | 0.60          | 0.00034   |
| L-threonate                                         | HMDB00943 | 151152    | C01620 | 1                  | 0.62          | 0.00221   |
| C16H26O3(4)                                         | NA        | NA        | NA     | 1                  | 0.64          | 0.01419   |
| 3-Deoxy-D-glycero-D-galacto-2-nonulosonic acid      | HMDB00425 | 22833524  |        | 1                  | 0.65          | 0.00000   |
| tetradecanoyl carnitine(myristoyl carnitine)        | HMDB05066 | 53477791  |        | 1                  | 0.65          | 0.01373   |
| cytidine                                            | HMDB00089 | 6175      | C00475 | 1                  | 1.57          | 0.01469   |
| citr_L[e]                                           | NA        | NA        | NA     | 1                  | 1.60          | 0.00533   |
| Biotin                                              | HMDB00030 | 171548    | C00120 | 1                  | 1.68          | 0.00790   |
| sphingosine/(2S)-1-hydroxy-3-oxooctadecan-2-aminium | HMDB00252 | 5353955   | C00319 | 1                  | 1.68          | 0.01128   |
| L-4-hydroxyglutamate semialdehyde                   | HMDB06556 | 8224      | C05938 | 1                  | 1.69          | 0.00040   |



|                                                     |           |          |        |   |      |         |
|-----------------------------------------------------|-----------|----------|--------|---|------|---------|
| beta-1-4-mannose-N-acetylglucosamine                | HMDB06535 | 53477853 |        | 1 | 1.71 | 0.01469 |
| L-methionine                                        | HMDB00696 | 6137     | C00073 | 1 | 1.72 | 0.00160 |
| S-[2-carboxy-1-(1 H-imidazol-4-yl)ethyl]-L-cysteine | NA        | NA       | NA     | 1 | 1.72 | 0.01737 |
| N-acetyl-seryl-aspartate                            | NA        | NA       | NA     | 1 | 1.78 | 0.00325 |
| L-histidine                                         | HMDB00177 | 6274     | C00135 | 1 | 1.85 | 0.01143 |
| N(2)-acetyl-L-ornithine                             | HMDB03357 | 439232   | C00437 | 1 | 1.92 | 0.00869 |
| Dihydroxyacetone phosphate                          | HMDB01473 | 668      | C00111 | 1 | 2.16 | 0.00119 |
| Glycerol 3-phosphate                                | HMDB00126 | 439162   | C00093 | 1 | 2.25 | 0.00002 |
| N-acetyl-L-glutamate                                | HMDB01138 | 185      | C00624 | 1 | 2.30 | 0.00302 |
| 3-Hydroxy-N6N6N6-trimethyl-L-lysine                 | HMDB01422 | 439460   | C01259 | 1 | 2.40 | 0.00082 |
| Glycylproline/L-Prolinylglycine                     | HMDB00721 | 79101    | NA     | 1 | 2.53 | 0.00626 |
| L-cysteine                                          | HMDB00574 | 5862     | C00097 | 1 | 2.71 | 0.00416 |
| dUMP                                                | HMDB01409 | 65063    | C00365 | 1 | 3.85 | 0.00001 |

\* n=3 repeats, p value was calculated using two-tailed unpaired Student's t-test.

**Supplementary Table 3 Metabolites that are significantly altered in both siHNF4A HepG2 and SNU449 cells**

| Compound name                                       | HMDB      | PubChem   | KEGG   | Relative abundance |               |              |
|-----------------------------------------------------|-----------|-----------|--------|--------------------|---------------|--------------|
|                                                     |           |           |        | HepG2 siNeg        | HepG2 siHNF4A | SNU449 siNeg |
| CMP-N-trimethyl-2-aminoethylphosphonate             | HMDB60072 | 440755    | C05674 | 1                  | 0.03          | 0.61         |
| Deoxyinosine                                        | HMDB00071 | 65058     | C05512 | 1                  | 0.04          | 0.19         |
| C9H13N5O3(4)                                        | NA        | NA        | NA     | 1                  | 0.26          | 0.01         |
| L-xylonate/L-lyxonate                               | HMDB60256 | 6971043   | C05411 | 1                  | 0.32          | 0.27         |
| decenoyl carnitine                                  | NA        | NA        | NA     | 1                  | 0.32          | 0.17         |
| D-Glucuronate 1-phosphate                           | HMDB03976 | 440650    | C05385 | 1                  | 0.34          | 0.23         |
| alpha-linolenyl carnitine/gamma-linolenyl carnitine | HMDB06319 | 53477821  |        | 1                  | 0.36          | 3.35         |
| Hypotaurine                                         | HMDB00965 | 107812    | C00519 | 1                  | 0.38          | 0.29         |
| decanoyl carnitine                                  | HMDB06210 | 53477803  |        | 1                  | 0.39          | 0.19         |
| pseudocigonine/ecgonine                             | HMDB06348 | 443845    | C12449 | 1                  | 0.39          | 0.43         |
| octanoyl carnitine/L-Octanoylcarnitine              | HMDB00791 | 11953814  | C02838 | 1                  | 0.43          | 0.39         |
| lauroyl carnitine                                   | HMDB02250 | 168381    |        | 1                  | 0.43          | 0.42         |
| 3-Hydroxybutyrylcarnitine                           | HMDB13127 | 53481617E | NA     | 1                  | 0.44          | 0.50         |
| N-phosphocreatinate                                 | HMDB01511 | 587       | C02305 | 1                  | 0.44          | 0.05         |
| (R)-carnitine                                       | HMDB00062 | 2724480   | C15025 | 1                  | 0.45          | 0.40         |
| octenoyl carnitine                                  | NA        | NA        | NA     | 1                  | 0.46          | 0.53         |
| UDP-D-glucuronate                                   | HMDB00935 | 17473     | C00167 | 1                  | 0.46          | 0.25         |
| O-Phospho-L-serine                                  | HMDB01721 | 106       | C01005 | 1                  | 0.47          | 0.11         |
| N-Methylethanolamine phosphate                      | NA        | NA        | C01210 | 1                  | 0.47          | 2.59         |
| O-acetylcarnitine                                   | HMDB00201 | 1         | C02571 | 1                  | 0.50          | 0.46         |
| acetylcholine/4-(trimethylammonio)butanoate         | HMDB00895 | 187       | C01996 | 1                  | 0.53          | 0.40         |
| 11'-Carboxy-alpha-chromanol                         | HMDB12515 | 53481451  |        | 1                  | 0.54          | 0.36         |
| Sedoheptulose 7-phosphate                           | METPA0585 | NA        | C05382 | 1                  | 0.56          | 0.08         |
| Cystathionine                                       | HMDB00099 | 439258    | C02291 | 1                  | 0.59          | 0.20         |
| choline phosphate                                   | HMDB01565 | 1014      | C00588 | 1                  | 0.59          | 0.59         |
| trans-Hexadec-2-enoyl carnitine                     | HMDB06317 | 53477817  |        | 1                  | 0.60          | 2.92         |
| gulonate                                            | HMDB03290 | 152304    | C00800 | 1                  | 0.60          | 0.46         |
| Linoleyl carnitine/Linoelaidyl carnitine            | HMDB06469 | 6450015   |        | 1                  | 0.60          | 6.17         |
| tetradecanoyl carnitine(myristoyl carnitine)        | HMDB05066 | 53477791  |        | 1                  | 0.65          | 2.41         |
| cytidine                                            | HMDB00089 | 6175      | C00475 | 1                  | 1.57          | 2.07         |
| citr_L[e]                                           | NA        | NA        | NA     | 1                  | 1.60          | 1.80         |
| Biotin                                              | HMDB00030 | 171548    | C00120 | 1                  | 1.68          | 1.86         |
| sphingosine/(2S)-1-hydroxy-3-oxooctadecan-2-aminium | HMDB00252 | 5353955   | C00319 | 1                  | 1.68          | 1.54         |
| L-4-hydroxyglutamate semialdehyde                   | HMDB06556 | 8224      | C05938 | 1                  | 1.69          | 1.65         |
| L-methionine                                        | HMDB00696 | 6137      | C00073 | 1                  | 1.72          | 1.64         |
| N-acetyl-seryl-aspartate                            | NA        | NA        | NA     | 1                  | 1.78          | 0.66         |
| L-histidine                                         | HMDB00177 | 6274      | C00135 | 1                  | 1.85          | 1.87         |
| N(2)-acetyl-L-ornithine                             | HMDB03357 | 439232    | C00437 | 1                  | 1.92          | 3.25         |
| Glycerol 3-phosphate                                | HMDB00126 | 439162    | C00093 | 1                  | 2.25          | 0.12         |
| N-acetyl-L-glutamate                                | HMDB01138 | 185       | C00624 | 1                  | 2.30          | 2.73         |
| L-cysteine                                          | HMDB00574 | 5862      | C00097 | 1                  | 2.71          | 2.95         |
| dUMP                                                | HMDB01409 | 65063     | C00365 | 1                  | 3.85          | 0.12         |

Note: Metabolites highlighted Blue were changed to different directions in HNF4A knockdown HepG2 cells and SNU449 cells.

**Supplementary Table 4 MS parameters of LC-MS analysis of SAA pathway metabolites**

| <b>compound</b>   | <b>chemical formula</b>                                                       | <b>molecular weight</b> | <b>predicted ion mass</b> | <b>quad isolation</b> | <b>normalized collision energy</b> | <b>extracted ion chromatogram</b> |
|-------------------|-------------------------------------------------------------------------------|-------------------------|---------------------------|-----------------------|------------------------------------|-----------------------------------|
| Methionine        | C <sub>5</sub> H <sub>11</sub> NO <sub>2</sub> S                              | 149.05105               | 150.058326                | 150                   | 30                                 | 104.05-104.06                     |
| MTA               | C <sub>11</sub> H <sub>15</sub> N <sub>5</sub> O <sub>3</sub> S               | 297.08956               | 298.096836                | 298                   | 40                                 | 136.05-126.07                     |
| SAM               | C <sub>15</sub> H <sub>23</sub> N <sub>6</sub> O <sub>5</sub> S               | 399.14451               | 399.14451                 | 399                   | 30                                 | 250.09-250.1                      |
| SAH               | C <sub>14</sub> H <sub>20</sub> N <sub>6</sub> O <sub>5</sub> S               | 384.12159               | 385.128866                | 385                   | 30                                 | 250.07-250.08                     |
| Glutathione (red) | C <sub>10</sub> H <sub>17</sub> N <sub>3</sub> O <sub>6</sub> S               | 307.08381               | 308.091086                | 308                   | 25                                 | 179.04-179.06                     |
| Glutathione (ox)  | C <sub>20</sub> H <sub>32</sub> N <sub>6</sub> O <sub>12</sub> S <sub>2</sub> | 612.15196               | 613.159236                | 613                   | 30                                 | 355.1-355.2                       |
| Cysteine          | C <sub>3</sub> H <sub>7</sub> NO <sub>2</sub> S                               | 121.01975               | 122.027026                | 122                   | 30                                 | 76.0-76.05                        |
| Homocysteine      | C <sub>4</sub> H <sub>9</sub> NO <sub>2</sub> S                               | 135.0354                | 136.042676                | 136                   | 30                                 | 118.0-118.1                       |

**Supplementary Table 5 Sequences of primers**

| Name                    | Sequence                  |
|-------------------------|---------------------------|
| <b>qPCR primers</b>     |                           |
| 18SF                    | CGTCTGCCCTATCAACTTTTCG    |
| 18SR                    | TGCCTTCCTTGGATGTGGTAG     |
| ASNSF                   | GCAGCTGAAAGAAGCCCAAGT     |
| ASNSR                   | TGTCTTCCATGCCAATTGCA      |
| ATF4F                   | CCCTTCACCTTCTTACAACCTC    |
| ATF4R                   | TGCCCAGCTCTAAACTAAAGGA    |
| BHMTF                   | TGGAGAACAGGGGCAACTATG     |
| BHMTR                   | CTGACTCACTCCTCCTGCTAC     |
| CBSF                    | GGCCAAGTGTGAGTTCTTCAA     |
| CBSR                    | GGCTCGATAATCGTGTCCCC      |
| CDOF                    | GGGCAATGTACGCCAAGTTC      |
| CDOR                    | TGAATACTGCTGCCATGTCCT     |
| CHOPF                   | GAACGGCTCAAGCAGGAAATC     |
| CHOPR                   | TTCACCATTCCGGTCAATCAGAG   |
| COL3A1F                 | GGTGTCCCAGGGAAAGATGG      |
| COL3A1R                 | TATACCTGGAAGTCCGGGGG      |
| COL4A5F                 | CAACCCCTAAAGGGCCAGAG      |
| COL4A5R                 | TGTGAAGTGCATCACCACA       |
| COL4A6F                 | GAATGAAGGGGAAGGCAGGG      |
| COL4A6R                 | TAGACCCAAGGGTCCAGGAG      |
| COL6A1F                 | TCAAAAATAACGTGGAGCAAGTGTG |
| COL6A1R                 | CCCCGGCTTGCCTCGTT         |
| CPED1F                  | CTGCCAGTGGATGGAGTACATT    |
| CPED1R                  | TGAATGTGTCAACTACTTCATAGCC |
| CTHF                    | CATGAGTTGGTGAAGCGTCAG     |
| CTHR                    | AGCTCTCGGCCAGAGTAAATA     |
| EcadherinF              | AGTGGGCACAGATGGTGTGA      |
| EcadherinR              | TAGGTGGAGTCCCAGGCGTA      |
| Fibronectin1F           | CTGAAAGACCAGCAGAGGCA      |
| Fibronectin1R           | GTGTAGGGGTCAAAGCACGA      |
| HNF1AF                  | AACACCTCAACAAGGGCACTC     |
| HNF1AR                  | CCCCACTTGAACGGTTTCT       |
| HNF4AF                  | CGAAGGTC AAGCTATGAGGACA   |
| HNF4AR                  | ATCTGCGATGCTGGCAATCT      |
| ITGAVF                  | GACCATCTCATCACTAAGCGGG    |
| ITGAVR                  | AGCACTGAGCAACTCCACAAC     |
| MAT1AF                  | ATCAGGGTTTGATGTTCCGGCT    |
| MAT1AR                  | GCGTTGAGCTTGTGAGCAA       |
| MRSF                    | AGGCCCGGAAGATTGTGTG       |
| MRSR                    | AGAGGTAGTTGCCGCTATCCA     |
| N-cadherinF             | GAACGCCAGGCCAACAACCTT     |
| N-cadherinR             | TGCAGCTGGCTCAAGTCATAGT    |
| TWIST1F                 | GTCCGCAGTCTTACGAGGAG      |
| TWIST1R                 | GCTTGAGGGTCTGAATCTTGCT    |
| VimentinF               | CCTCACCTGTGAAGTGGATGC     |
| VimentinR               | CAACGGCAAAGTTCTCTTCCA     |
| <b>ChIP-PCR primers</b> |                           |
| BHMTF                   | GGACTTCAGTCTTATGACCTCCC   |
| BHMTR                   | AGGAAGTGAGTTCTGCAATAAACTG |
| CBSF                    | GGCATTGTGTCAGAGGGTGA      |
| CBSR                    | CACTGCTCCTTAGCAGGCAT      |
| CDO1F                   | GCTTCAAATCTCCATCCTTTGGTC  |
| CDO1R                   | CTTGACATTTGTGGTGTGAGGT    |

|                                        |                                                          |
|----------------------------------------|----------------------------------------------------------|
| CTHF                                   | CTAAGCCAGCTTTCGCCAC                                      |
| CTHR                                   | CCTGGGTCCAAGTGGTGTTAG                                    |
| MAT1AF                                 | CGGGGTAAATCTGACTGAAAGAGA                                 |
| MAT1AR                                 | TTAAGTCCTCCCTTACGCACA                                    |
| <b>Luc reportor constructs primers</b> |                                                          |
| MAT1A                                  |                                                          |
| MAT1A Promoter F                       | CGAGCTCTTACGCGTGCTAGCTCGAAGCTCCATCACTAAACTGCTC           |
| MAT1A Promoter R                       | ACTTAGATCGCAGATCTCGAGCACACAGTTGATCTCACTGACATGC           |
| MAT1A Mut F                            | CTCCAGAGGCTTGTCAAGTGAAGCTTTTTTTTTGAAGGCTGCTGCATGTCAGTGAG |
| MAT1A Mut R                            | CTCACTGACATGCAGCAGCCTTCAAAAAAAAAAGCTTCACTGACAAGCCTCTGGAG |
| BHMT                                   |                                                          |
| BHMT Promoter F                        | CGAGCTCTTACGCGTGCTAGCTATGACCTCCCTCATCTGGTTGACT           |
| BHMT Promoter R                        | ACTTAGATCGCAGATCTCGAGCCAGGTGATCCATCCGCCTCGGCCT           |
| BHMT Mut F                             | CATCTGGTTGACTCCAGTAGGGGGGGGGGGGGTAGGCAGCCTCCCAAGGACAG    |
| BHMT Mut R                             | CTGTCTTGGGAGGCTGCCTACCCCCCCCCCCCCCTACTGGAGTCAACCAGATG    |
| CBS                                    |                                                          |
| CBS Promoter F                         | CGAGCTCTTACGCGTGCTAGCGAGGCCGGAGTGGAAGCAGCGA              |
| CBS Promoter R                         | ACTTAGATCGCAGATCTCGAGAGCCACAGACCCTCCAAATTCCTTCC          |
| CBS Mut F                              | TGGAAGCAGCAGGGTGTGAAGGGGGGGGGGGGGGGGAAGGCAGAAGCAAGCAGGTG |
| CBS Mut R                              | CACCTGCTTGCCTTGCCTTCCCCCCCCCCCCCCCCCTTACACCCTCGCTGCTTCCA |

## Supplementary References

1. Qiu, Z. *et al.* A Pharmacogenomic Landscape in Human Liver Cancers. *Cancer Cell* **36**, 179-193 e111 (2019).
2. Davis, C.A. *et al.* The Encyclopedia of DNA elements (ENCODE): data portal update. *Nucleic Acids Res* **46**, D794-D801 (2018).
